1 *Research article*

2

3 ***Txn1* mutation causes epilepsy associated with vacuolar degeneration in the**  
4 **midbrain**

5 Iori Ohmori<sup>\*1,2</sup>, Mamoru Ouchida<sup>3</sup>, Hirohiko Imai<sup>4</sup>, Saeko Ishida<sup>5</sup>, Shinya Toyokuni<sup>6</sup>, Tomoji  
6 Mashimo<sup>5</sup>.

7

8 <sup>1</sup> Section of Developmental Physiology and Pathology, Education, Institute of Academic and  
9 Research, Okayama University, Tsushima 3-chome 1-1, Kita-ku, Okayama 700-8530, Japan

10 <sup>2</sup> Department of Child Neurology, Medicine, Dentistry and Pharmaceutical Sciences,  
11 Okayama University, Shikatacho 2-chome 5-1, Kita-Ku, Okayama 700-8558, Japan.

12 <sup>3</sup> Department of Molecular Oncology, Medicine, Dentistry and Pharmaceutical Sciences,  
13 Institute of Academic and Research, Okayama University, Shikatacho 2-Chome 5-1, Kita-Ku,  
14 Okayama 700-8558, Japan.

15 <sup>4</sup> Department of Systems Science, Kyoto University Graduate School of Informatics,  
16 Yoshida-Honmachi, Sakyo-ward, Kyoto 606-8501, Japan.

17 <sup>5</sup> Division of Animal Genetics, Laboratory Animal Research Center, Institute of Medical  
18 Science, The University of Tokyo, Tokyo, 108-8639, Japan.

19 <sup>6</sup> Department of Pathology and Biological Responses, Nagoya University Graduate School of  
20 Medicine, 65 Tsurumai-Cho, Showa-Ku, Nagoya 466-8550, Japan

21

22

23

24 **\*Correspondence:** [iori@md.okayama-u.ac.jp](mailto:iori@md.okayama-u.ac.jp)

25

26



28 **Abstract**

29 Thioredoxin (TXN), encoded by *Txn1*, acts as a critical antioxidant in the defense against  
30 oxidative stress by regulating the dithiol/disulfide balance of interacting proteins. The role of  
31 TXN in the central nervous system (CNS) is largely unknown. A phenotype-driven study of  
32 *N*-ethyl-*N*-nitrosourea-mutated rats with running seizures at around five-week of age revealed  
33 the relevance of *Txn1* mutations to CNS disorders. Genetic mapping identified *Txn1*-F54L in  
34 epileptic rats. The insulin-reducing activity of *Txn1*-F54L rats was approximately one-third  
35 that of the wild-type. Vacuolar degeneration in the midbrain, mainly in the thalamus and the  
36 inferior colliculus, was observed in the *Txn1*-F54L rats. The lesions displayed neuronal and  
37 oligodendrocyte cell death. Neurons in *Txn1*-F54L rats showed morphological changes in the  
38 mitochondria. Vacuolar degeneration began at three weeks of age, and spontaneous repair  
39 began at seven weeks; a dramatic change from cell death to repair occurred in the midbrain  
40 during a restricted period. In conclusion, *Txn1* is essential for the development of the  
41 midbrain in juvenile rats.

42

43 **Keywords**

44 *Txn1*, Thioredoxin, mitochondria, neuron, vacuolar degeneration, epilepsy, oxidative stress

45

46 **List of abbreviations**

47 CNS, central nervous system;

48 WT, wild type;

49 ROS, reactive oxygen species

50 NADPH, Nicotinamide adenine dinucleotide phosphate;

51 NOX, NADPH oxidases;

52 ENU, N-ethyl-N-nitrosourea

53 SOD, superoxide dismutase;

54 CAT, catalase;

55 HD, Huntington's disease;

56 ALS, amyotrophic lateral sclerosis;

57 MS, multiple sclerosis;

58 GSH, Glutathione;

59 GPx, glutathione peroxidase;

60 Prdx, peroxiredoxin

61 Txn, thioredoxin;

62 MRI, magnetic resonance imaging;

63 8-OHdG, 8-hydroxy-2'-deoxyguanosine;

64 4-HNE, 4-hydroxynonenal

65 TUNEL, Terminal deoxynucleotidyl transferase-mediated dUTP Nick End Labeling

66 PBS, phosphate-buffered saline;

67 HE, hematoxylin and eosin;

68 KB, Klüber-Barrera

69 DAB, 3,3'-diaminobenzidine;

70 IHC, immunohistochemistry;

71 GFAP, glial fibrillary acidic protein;

72 GAPDH, Glyceraldehyde 3-phosphate dehydrogenase

73 TEM, Transmission electron microscope;

74

## 75 **Introduction**

76 The brain is more vulnerable to oxidative stress than other organs. Compared to the liver or  
77 kidney, the brain has a higher oxygen consumption, in some areas has an increased iron  
78 content that catalyzes the generation of reactive oxygen species (ROS), has elevated amounts  
79 of lipids with unsaturated fatty acids, and has lower activities of superoxide dismutase (SOD),  
80 catalase (CAT), and glutathione peroxidase (GPx) [1]. Several studies have implicated  
81 oxidative stress in the development of neurodegenerative diseases such as Alzheimer's  
82 disease, Parkinson's disease, Huntington's disease (HD), amyotrophic lateral sclerosis (ALS),  
83 and multiple sclerosis (MS) [2, 3, 4].

84

85 The primary endogenous sources of ROS in mammals are the mitochondrial respiratory chain  
86 and NADPH oxidase (NOX). [5, 6, 7]. Oxidative stress modulates functions ranging from cell  
87 homeostasis to cell death [8]. Low levels of mitochondrial ROS production under  
88 physiological conditions are required for cellular signaling pathways, such as those regulating  
89 proliferation and differentiation. In contrast, excess ROS causes protein denaturation and  
90 promotes cell death. The delicate balance between the beneficial and harmful effects of ROS  
91 is a vital aspect of living cells and tissues [8].

92

93 Living organisms have a defense system that scavenges ROS produced by mitochondria. The  
94 enzymatic antioxidant system consists of SOD, CAT, GPx, and thioredoxin (Txn). Txn was  
95 first identified as a hydrogen donor for ribonucleotide reductase in *Escherichia coli* [9]. In  
96 humans, thioredoxin has been identified in the culture media of adult T-cell leukemia cell  
97 lines and Epstein-Barr virus-infected cells [10]. Subsequently, it has been reported that  
98 thioredoxin expression is upregulated in many cancer cells and that it inhibits apoptosis of  
99 cancer cells [11, 12]. Accordingly, the thioredoxin system has attracted attention as a target

100 for cancer therapy [13, 14, 15]. However, fewer studies have investigated the roles of the  
101 TXN system *in vivo*. A previous study reported that transgenic mice overexpressing a  
102 dominant-negative mutant of *Txn1* specifically in the heart show cardiac hypertrophy [16].  
103 Homozygous *Txn1* knockout mice are embryonically lethal, whereas heterozygous mice show  
104 normal development [17]. Other than these reports, little is known about the effects of  
105 reduced TXN activity *in vivo*.

106

107 Here, we present a novel animal model for neurodegeneration designated the  
108 *Adem* “Age-dependent mitochondrial cytopathy” rat. These animals harbor a *Txn1* missense  
109 mutation (F54L). *Adem* exhibit a unique seizure phenotype that appears only at 5 weeks of  
110 age. Detailed histological analyses and anatomical analyses using MRI revealed vacuolar  
111 degeneration in the midbrain during the epileptic period. Our study reveals a hitherto  
112 unknown function of *Txn1* in the CNS.

113

## 114 **Materials and methods**

### 115 *Animals*

116 We used *Txn1*-F54L rats (*Adem*; Age-dependent mitochondrial cytopathy rat) generated by  
117 ENU-mutagenesis and a *Txn1*- T160C (p. F54L) knock-in rat generated by CRISPR-Cas 9.  
118 We used the former to characterize the phenotype and the latter to confirm the reproducibility  
119 of the phenotype. The *Txn1*-F54L rat was initially discovered in an ENU-induced mutant  
120 archive at Kyoto University [18, 19, <http://www.anim.med.kyoto-u.ac.jp/nbr>] as a rare strain  
121 with frequent running seizures only in its juvenile stage. All animal husbandry procedures  
122 were performed according to the protocols approved by the institutional experimental animal  
123 use committees Okayama University, Osaka University, and Kyoto University. Both sexes  
124 were used in the present study.

125

126 ***Genetic mapping and sequencing analysis of the Adem rat generated by ENU-mutagenesis***

127 The rats with running seizures were backcrossed for more than ten generations on the  
128 *F344/NSlc* inbred background (Japan SLC, Hamamatsu, Japan). The repeated backcrosses  
129 ensure that the frequency of potential mutations induced by ENU elsewhere in the genome is  
130 reduced to approximately 1 in  $4 \times 10^6$  bp of the genome. To identify the causative gene, we  
131 produced 117 (*Adem* × *BN/SsNSlc*) × *BN/SsNSlc* backcross progeny. Genetic mapping of the  
132 locus was determined in rats that displayed wild running or generalized tonic-clonic seizure  
133 phenotypes. Genomic DNA was extracted from rat tail biopsies by an automatic genomic  
134 DNA isolation system (PI-200; Kurabo, Osaka, Japan). To localize the locus to a specific  
135 chromosomal region, genome-wide scanning on DNA samples was performed using simple  
136 sequence length polymorphism (SSLP) markers covering all autosomal chromosomes (Chrs)  
137 as previously reported [20].

138 To enrich the 1.5-Mb region (Chr 5: 75,159,000 to 76,708,000), SureSelect custom DNA  
139 probes were designed by SureDesign under moderately stringent conditions, and generated by  
140 Agilent Technologies (Santa Clara, CA, USA). The DNA library was prepared using  
141 SureSelect reagents and a custom probe kit. Genomic sequence analysis was performed by  
142 HiSeq 2500 ( $2 \times 150$  bp) according to the standard protocol at Takara Bio.

143

144 ***Generation of *Txn1*- T160C (p. F54L) knock-in rat using CRISPR-Cas 9***

145 The possibility of genomic DNA alterations around the *Txn1* gene could not be fully excluded  
146 in *Txn1*-F54L rats generated by ENU mutagenesis. As the *Txn1* mutant rats showed a unique  
147 phenotype, never previously reported, we generated a new *Txn1*-F54L knock-in rat to test the  
148 reproducibility of this phenotype. A *Txn1* T160C (p. F54L) knock-in rat was generated by  
149 CRISPR-Cas9 genome editing with long single-stranded DNA (lssDNA), as previously  
150 reported [21]. A pair of guide RNAs (gRNAs) targeting intron 1 and intron 2 of rat *Txn1* were



151 designed. LssDNA for *Txn1* was synthesized using a long ssDNA Preparation Kit  
152 (Biodynamics Laboratory Inc., Tokyo, Japan) following the manufacturer's protocol. The  
153 sequences of gRNA and ssDNA are listed in Supplementary Table 1. Cas9 mRNA (400 ng/μl),  
154 gRNA (200 ng/μl), and ssDNA (40 ng/μl) were delivered into 113 *F344/Jcl* embryos by  
155 electroporation as previously reported [22]. The two-cell stage embryos (n = 110) were  
156 transferred into the oviducts of five pseudopregnant females. Genomic DNA from founder  
157 rats was extracted from the tail biopsies. The CRISPR target site was amplified using the  
158 specific primer pairs listed in Supplementary Table 1.

159

### 160 ***Genotyping***

161 The last 3 mm of the rat tail was cut at three weeks of age, and DNA was purified with a  
162 DNeasy Blood & Tissue kit (Qiagen, Hilden, Germany). A DNA fragment containing a  
163 mutation was amplified with a pair of primers as follows: FW 5' - CCA CAT GGG AGA  
164 GTC ACA T -3' and RV 5' - ATA GCC TGG AAG CGG TCA GAT G -3' (Sigma-Aldrich  
165 Japan, Inc., Tokyo, Japan). The PCR products (521 bp) were then treated with the restriction  
166 enzyme *Bsp1286I* (New England Biolabs, Ipswich, MA, USA), and the F54L mutant DNA  
167 was digested to 260 bp and 261 bp fragments. Genotyping was determined by the size of the  
168 digested fragments on a 3% agarose gel.

169

### 170 ***Video monitoring of epileptic seizures***

171 To clarify the appearance and frequency of epileptic seizures, both the heterozygotes (n = 8)  
172 and homozygotes (n = 9) were placed under a 24-hour video monitoring system (Handycam  
173 HDR-CX480, SONY, Japan) from week three to nine,

174

### 175 ***Histological analysis***

176 Brains were fixed with 10% formalin neutral buffer solution. Tissue sections were cut from  
177 paraffin-embedded brain samples taken at 2, 3, 5, and 9 weeks of age and were subjected to  
178 hematoxylin and eosin (HE) and Bodian and Klüver-Barrera (KB) staining using standard  
179 protocols. The stained sections were examined under a BZX-700 microscope (Keyence,  
180 Osaka, Japan). We evaluated brain lesions, including samples from the thalamus and the  
181 inferior colliculus, in the sagittal and coronal planes.

182

### 183 *Head MRI*

184 To evaluate the extent of brain lesions and their changes over time, an MRI scan was  
185 performed in 1 mm slices. Three animals were examined for each genotype at 5, 7, and 9  
186 weeks of age. The same animal was examined twice on days 1 and 14 as the storage period of  
187 the MRI-attached breeding room was limited to no longer than two weeks. The mice were  
188 anesthetized with isoflurane and laid in the prone position on a cradle. Anesthesia was  
189 maintained by inhalation of 2% isoflurane in air at 1.4 L/min through a face mask.  
190 Throughout the MRI measurements, respiratory rate and rectal temperature were monitored  
191 using a dedicated system (Model 1025, MR-compatible Small Animal Monitoring and Gating  
192 System, SA Instruments, Inc., NY, USA). The body temperature was maintained by a flow of  
193 warm air using a heater system (MR-compatible Small Animal Heating System, SA  
194 Instruments).

195

196 All MR images were obtained with a 4.7 Tesla preclinical MR scanner (BioSpec 47/16 USR,  
197 Bruker BioSpin MRI GmbH, Ettlingen, Germany). A quadrature volume resonator (Bruker  
198 BioSpin) was used for signal detection. The scanner was operated using ParaVision 6.0.1  
199 (Bruker BioSpin). Two-dimensional multi-slice T2-weighted MR imaging was performed  
200 using a rapid acquisition with relaxation enhancement (RARE) sequence. The whole-head  
201 images were acquired in three orthogonal (coronal, sagittal, and axial) orientations. The

202 acquisition parameters were as follows: echo time (TE), 12 ms; effective TE, 36 ms; RARE  
203 factor, 8; acquisition bandwidth, 62.5 kHz; in-plane spatial resolution,  $0.156 \times 0.156 \text{ mm}^2$ ;  
204 slice thickness, 1 mm; slice gaps, 0 mm; the number of averages, 2. For coronal orientation,  
205 repetition time (TR), 3000 ms; field of view (FOV),  $25 \times 29.3 \text{ mm}^2$ , matrix size,  $120 \times 136$   
206 (zero-filled to  $160 \times 188$  before image reconstruction); the number of slices, 24; acquisition  
207 time, 1 min 42 s. For sagittal orientation, TR, 2500 ms; FOV,  $27 \times 27.5 \text{ mm}^2$ , matrix size,  $131$   
208  $\times 128$  (zero-filled to  $173 \times 176$ ); number of slices, 18; acquisition time, 1 min 20 s. For axial  
209 orientation, TR, 2500 ms; FOV,  $27 \times 30.5 \text{ mm}^2$ , matrix size,  $131 \times 144$  (zero-filled to  $173 \times$   
210  $195$ ); the number of slices, 16; acquisition time, 1 min 30 s.

211

### 212 ***Western blotting***

213 Western blotting was used to quantify the different cell types of the brain lesion and Txn1  
214 expression levels in multiple organs in the rats. The protein extracts (10  $\mu\text{g}$ ) from rat tissues  
215 were mixed with sample buffer solution (Nakalai Tesque, Kyoto, Japan), denatured at  $95 \text{ }^\circ\text{C}$   
216 for 5 min, and loaded onto a sodium dodecyl sulfate (SDS)-polyacrylamide gel (Mini-protean  
217 TGX Precast gels; Bio-Rad, Hercules, CA) for electrophoresis. The proteins were blotted onto  
218 a polyvinylidene fluoride (PVDF) membrane using the iBlot Dry Blotting System (Thermo  
219 Fisher Scientific). Membranes were incubated with anti-Thioredoxin1 rabbit antibody  
220 (CST#2298; Cell Signaling Technology, Danvers, MA, USA), anti-NeuN rabbit antibody  
221 (ab177487; Abcam, Cambridge, UK), anti-Olig2 rabbit antibody (ab109186; Abcam),  
222 anti-glial fibrillary acidic protein (GFAP) rabbit antibody (ab7260; Abcam), anti-Iba1 rabbit  
223 antibody (ab178847; Abcam), and anti-glyceraldehyde 3-phosphate dehydrogenase (GAPDH)  
224 rabbit antibody (CST #2118). Mouse and rabbit primary antibodies were detected using  
225 anti-mouse IgG-HRP-linked antibody (CST #7076) and anti-rabbit IgG-HRP-linked antibody  
226 (CST; #7074), respectively. Chemiluminescence was detected using Western Lightning ECL  
227 Pro (PerkinElmer Japan, Kanagawa, Japan) and the ChemiDoc Touch (Bio-Rad).

228

229 ***Immunohistochemistry (IHC) analyses***

230 A standard IHC protocol was used to stain the brain tissue samples. In brief, 5- $\mu$ m-sized  
231 paraffin-embedded tissue sections were de-paraffinized with xylene. Antigen retrieval was  
232 performed by autoclaving at 120 °C for 5 min. Endogenous peroxidases were quenched by  
233 treatment with 0.3% hydrogen peroxide in methanol for 30 min at room temperature. They  
234 were then incubated with blocking serum for 1 h at 22-26 °C. Sections were incubated with  
235 the following primary antibodies to determine the cell type in the brain lesion: anti-NeuN  
236 rabbit antibody (ab177487; Abcam, Cambridge, UK) and anti-Olig2 rabbit antibody  
237 (ab109186; Abcam) for 1 h at room temperature. To determine DNA oxidative injury and  
238 lipid peroxidation, sections were stained with anti-8-hydroxy-2'-deoxyguanosine (8-OHdG)  
239 mouse antibody (MOG-020P, JaICA, Japan), and anti-4-hydroxynonenal (4-HNE) mouse  
240 antibody (MHN-020P, JaICA, Japan) overnight at 4 °C, respectively. The sections were then  
241 reacted with a biotinylated rabbit polyclonal secondary antibody (PK-6200, Vector  
242 Laboratories, Burlingame, CA, USA). To reveal the staining, we used an avidin-biotinylated  
243 peroxidase complex (PK-6200, Vector Laboratories). After washing, the slides were  
244 incubated with 3,3'-diaminobenzidine (DAB) (SK-4100, Vector Laboratories) and  
245 immediately washed with tap water after color development. The slides were then  
246 counterstained with hematoxylin, mounted with dibutyl phthalate xylene (DPX) and observed  
247 under a BZX-700 multifunctional microscope (Keyence, Osaka, Japan). Quantification of  
248 IHC was performed by assessing five randomly selected fields in the inferior colliculus and  
249 thalamus. The percentages of positive cells or positive areas were calculated using BZX  
250 Analyzer software (Keyence).

251

252 ***Transmission electron microscopy (TEM)***

253 Samples were immersed in 2% glutaraldehyde and 2% paraformaldehyde in 100 mM  
254 phosphate buffer (PB) for 24 h at 4 °C. They were then postfixed with 2% osmium tetroxide  
255 in 100 mM PB for 1.5 h at 4 °C, after which they were rinsed with 100 mM PB, and  
256 dehydrated through a graded series of ethanol treatments. They were embedded in Spurr resin  
257 (Polysciences Inc., Warrington, PA, USA), cut into ultrathin sections, and stained with uranyl  
258 acetate and lead citrate. The ultrathin sections were observed using a Hitachi H-7650 TEM  
259 (Hitachi High-Tech Corp., Tokyo, Japan).

260

### 261 ***Plasmids and purification of recombinant proteins***

262 For recombinant Thiredoxin1 proteins, rat *Txn1* cDNAs were amplified by PCR using  
263 LA-Taq polymerase (Takara Bio Inc, Shiga, Japan) with FW-primer: 5'-GGA TCC ATG  
264 GTG AAG CTG ATC GAG AG-3'; and RV-primer, 5'- GTC GAC TTA GCT GTC CAT  
265 GTG CTG GCG TTC GAA TTT AGC GGT TTC TTT GAA TTC GGC AAA CTC CGT  
266 AAT AGT GG-3' (Sigma-Aldrich Japan, Inc., Tokyo, Japan). The PCR products were cloned  
267 into a pCMV-Tag2 plasmid (Stratagene, San Diego, CA, USA) digested with *Bam*HI and *Sal*I  
268 containing FLAG-tag and S-tag sequences. The DNA sequence of the plasmids was  
269 confirmed by DNA sequencing using a BigDye Terminator FS Ready-Reaction Kit (Applied  
270 Biosciences, Little Chalfont, Buckinghamshire, UK) and an ABI 3130x Genetic Analyzer  
271 (Applied Biosciences). The plasmids were transfected into HEK293 human embryonic kidney  
272 cells using Lipofectamine2000 (Invitrogen, Carlsbad, CA, USA). The recombinant proteins  
273 were purified with anti-FLAG agarose affinity gel (A2220; Sigma-Aldrich Japan), eluted with  
274 FLAG peptide (A3290; Sigma-Aldrich Japan), and filtered using an ultrafiltration membrane  
275 (Amicon Ultra 3 K; Millipore, Burlington, MA, USA).

276

### 277 ***Insulin-reducing activity assay***

278 Thioredoxin activity was measured using a thioredoxin activity assay kit (Redoxica, Little  
279 Rock, AR, USA), according to the manufacturer's instructions. In brief, the purified  
280 recombinant thioredoxin1 proteins or protein extracts from rat thalamus and cortex were  
281 reacted with insulin and NADPH in assay buffer, and thioredoxin activity was determined as  
282 a change in the amount of oxidized NADPH by measuring the decrease in absorbance at 340  
283 nm per minute using a spectrophotometer DeNovix DS-11 (DeNovix, Tokyo, Japan).

284

### 285 *Primary fibroblast and neuron culture*

286 Newborn rats were sacrificed under deep anesthesia with isoflurane on the day of birth. The  
287 animals were dissected in the surgical suite and disinfected with 70% alcohol. For primary  
288 fibroblast culture, the abdominal skin tissues were cut into small pieces in DMEM (Fujifilm  
289 Wako Pure Chemical Corporation, Osaka, Japan) and disrupted by pipetting. The cell  
290 suspension was transferred and maintained in DMEM supplemented with 10% fetal bovine  
291 serum (Thermo Fisher Scientific, Waltham, MA, USA), 500U/ml penicillin, and 500 ug/ml  
292 streptomycin (Sigma-Aldrich Japan, Inc., Tokyo, Japan) in a fully humidified atmosphere of  
293 5% CO<sub>2</sub>. After about two weeks, fibroblast cells were cultured in DMEM supplemented with  
294 10% fetal bovine serum, 100U/ml penicillin, and 100 ug/ml streptomycin.

295

296 For primary neuronal culture, we referred to a protocol using a postnatal mouse [23] and  
297 modified it. We used the cerebral cortex of rats on the first postnatal day. Tissues were treated  
298 with 0.125% trypsin (Thermo Fisher Scientific) and 0.004% DNase-I (Sigma-Aldrich) at  
299 37 °C for 15 min and dissociated mechanically. Cells were plated on poly-l-lysine and  
300 laminin-coated glass-bottomed 35-mm culture dishes. Cells were maintained in a culture  
301 medium with DMEM, 100 µg/ml penicillin-streptomycin (Thermo Fisher Scientific) and 10%  
302 fetal calf serum (Thermo Fisher Scientific) at 37 °C in a humidified incubator with 95% air  
303 and 5% CO<sub>2</sub>. On the second day, the culture medium was replaced with a medium containing

304 DMEM, 2% B-27 supplement (Thermo Fisher Scientific), and 5% fetal calf serum. The  
305 culture medium was refed with a medium containing DMEM,  $\alpha$ -MEM, F-12 nutrient mixture,  
306 2% B-27 supplement, 0.34% glucose, 25  $\mu$ M 5-fluoro-deoxyuridine, 25  $\mu$ M uridine, one mM  
307 kynurenic acid (Sigma-Aldrich), and 1% fetal calf serum on the fourth day. Cultures were  
308 used for the experiments on days 9–15. Mitochondria and nuclei were stained using  
309 MitoBright LT Red (Dojindo, Kumamoto, Japan) and Cellstain-Hoechst33258 solution  
310 (Dojindo, Kumamoto, Japan), respectively.

311

### 312 *Terminal deoxynucleotidyl transferase (TdT) dUTP Nick-End Labeling (TUNEL) assay*

313 For determining apoptosis, paraffin-embedded brain tissues at three weeks of age and primary  
314 fibroblasts were assessed using the In Situ Cell Death Detection Kit, TMR red  
315 (Sigma-Aldrich Japan, Inc., Tokyo, Japan), following the manufacturer's instructions. We  
316 compared cell death during incubation of primary fibroblasts with and without the addition of  
317 300  $\mu$ M hydrogen peroxide for 3h. In brief, the cells were cultured on an 8-chamber culture  
318 slide (BD Falcon, Franklin Lakes, NJ, USA), washed with phosphate-buffered saline (PBS),  
319 fixed with 10% formalin neutral buffer solution (Fujifilm Wako Pure Chemical Corporation,  
320 Osaka, Japan) for one h at room temperature, and treated with permeabilization solution for 2  
321 min on ice. TMR red-labeled dUTP was incorporated into 3'-OH DNA ends by terminal  
322 deoxynucleotidyl transferase, and the fluorescence signal was detected using a BZX-700  
323 microscope (Keyence, Osaka, Japan) or a fluorescence microscope (Olympus IX71; Olympus  
324 Corporation, Tokyo, Japan).

325

### 326 *Statistical analysis*

327 Results are expressed as mean  $\pm$  SEM. The sample size for each experiment is indicated in the  
328 figure and figure legends. One-way analysis of variance (ANOVA) was used to compare  
329 between three groups. Statistical significance was set at  $p < 0.05$ . Bonferroni adjustment was

330 used to determine the statistical differences between the groups. All significant statistical  
331 results are indicated within the figures using the following conventions: \*  $p < 0.05$ , \*\*  $p <$   
332  $0.01$ , \*\*\*  $p < 0.001$ .

333

## 334 **Results**

### 335 *Discovery of a novel epileptic rat with Txn1 missense mutation*

336 A strain exhibiting unique running seizures was identified in an archive of ENU-mutated rats.  
337 Thus, we decided to identify the responsible gene. By analyzing simple sequence length  
338 polymorphism (SSLP) markers on mutant ( $n = 21$ ) and sibling ( $n = 25$ ) DNA pools,  
339 the *Adem* locus was roughly mapped on chromosomes 2 and 5. The locus was subsequently  
340 refined by 26 and 33 SSLP markers for each chromosome, and mapped to a 1.5-Mb genomic  
341 region, between markers D5Mit17 (Chr 5: 75,159,412–75,159,546) and D5Rat113 (Chr  
342 5:76,707,365–76,707,563) (RGSC\_v3.4) (Fig. 1A). Ten known or predicted genes within  
343 the *Adem* region  
344 (*Ptpn3*, *Palm2*, *AC134204.1*, *Akap2*, *LOC685849*, *Txn1*, *Txndc8*, *Svep1*, *Musk*, *Lpar1*) were  
345 identified from the Ensembl database (<http://www.ensembl.org>).

346

347 We performed next-generation sequencing analysis of genomic DNA from 75,159,000 to  
348 76,708,000 on Chr5 using the SureSelect target enrichment approach (Agilent). In mutant  
349 DNA, we found only one heterozygous missense mutation in the exon region, c. T160C, in  
350 exon 3 of the *Txn1* gene (NM\_053800, ENSRNOG00000012081.6) by comparing the  
351 parental strain F344/NSlc. This variant caused a substitution of phenylalanine for leucine at  
352 residue 54 (Fig. 1B).

353



354 Txn1 is widespread in prokaryotes and eukaryotes, and its amino acid sequence is well  
355 conserved in mammals (Fig. 1D). Amino acid sequences are 90% identical in humans and rats.  
356 Since the structure of rat thioredoxin has not been reported, we plotted the position of F54 on  
357 the 3D structure of human thioredoxin (UniProt, <https://www.uniprot.org/>). The positions of  
358 amino acids with important functions in Txn1 were plotted on the structure. Txn1 has an  
359 active center sequence Cys32-Gly-Pro-Cys35 motif and carries out redox reactions by  
360 dithiol/disulfide exchange reactions between Cys32 and Cys35 [24, 25, 26]. Both Cys69 and  
361 Cys73 are nitrosylated in response to nitric oxide (NO) [26, 27]. Cys-73 can serve as a donor  
362 for the nitrosylation of target proteins. The location of the F54L mutation is remote from these  
363 active sites (Fig. 1C and Fig. 1D), suggesting that it is not directly involved in the  
364 dithiol/disulfide exchange reaction or S-nitrosylation. However, the PolyPhen-2 prediction  
365 (<http://genetics.bwh.harvard.edu/pph2/index.shtml>) found that the F54L mutation is possibly  
366 damaging with a score of 0.785, and the Sorting Intolerant From Tolerant (SIFT,  
367 <http://www.ngl.org.uk/Manchester/page/sift-sorting-intolerant-tolerant.html>) sequence is  
368 deleterious.

369

### 370 ***Vacuolar degeneration appears during an epileptic period***

371 Video monitoring showed that the frequency of seizures peaks at 5-week of age in both  
372 heterozygotes (Fig. 2A) and homozygotes (Fig. 2B). There were no differences in seizure  
373 frequencies between heterozygotes and homozygotes.

374

375 Next, a histological examination was performed at five weeks to determine whether a  
376 structural change was the cause of epilepsy. Surprisingly, vacuolar degeneration was found in  
377 the inferior colliculus and thalamus of the mutants. (Fig. 2C). No changes were observed in  
378 the hippocampus, which is prone to epilepsy. Bodian staining, which is used to observe nerve  
379 fibers, and Klüver-Barrera (KB) staining, which is used to observe the myelin sheath,

380 exhibited decreased staining in the mutants. These histological tests showed that homozygotes  
381 had more severe lesions than heterozygotes. We examined when these lesions had started  
382 developing (Fig. 2D). There were no remarkable changes in the inferior colliculus at two  
383 weeks of age. However, vacuoles became evident in the inferior colliculus and thalamus at  
384 three weeks of age and were then widespread at five weeks of age. They almost disappeared  
385 completely after nine weeks.

386

### 387 ***MRI showed transient high signals of T2-weighted images in the midbrain***

388 MRI detected hyperintense regions of T2-weighted images (T2WI) spread around the  
389 thalamus in mutant rats at five weeks of age (Fig. 3A). The hyperintense regions of the  
390 heterozygous and homozygous T2WI were symmetrical. The lesions were localized in the  
391 thalamus, inferior colliculus, superior colliculus, and hypothalamus in homozygotes (Fig. 3B).  
392 The hyperintensity region of T2WI in homozygous rats was wider than that in heterozygous  
393 rats (see also Supplementary Fig. S1, S2, and S3). Temporal lesions were also examined using  
394 MRI in the same individual. Serial MRI examination revealed that the lesions at three weeks  
395 spread or were similar in size at five weeks. However, the lesions shrank at seven weeks and  
396 disappeared at nine weeks (Fig. 3C). The weekly changes observed on MRI were similar to  
397 those seen in the histological examination.

398

### 399 ***Neuronal and oligodendrocyte cell loss occurs in the midbrain***

400 Western blotting of the midbrain using NeuN, Olig2, GFAP, and anti-IbaI antibodies showed  
401 a decrease in NeuN and Olig2 and an increase in GFAP and IbaI expression in heterozygotes  
402 and homozygotes (Fig. 4A). Immunohistochemical studies showed significantly decreased  
403 numbers of NeuN-positive neurons (Fig. 4B and 4C) and Olig2-positive oligodendrocytes  
404 (Fig. 4D and 4E). NeuN-positive neurons in heterozygotes and homozygotes had larger cell  
405 bodies than wild-type (WT) rats. Electron microscopy of the lesions in the mutant rats

406 revealed that microtubules in the vacuoles and myelin sheath were wrapped around the  
407 vacuoles (Fig. 4H and 4I). These findings indicate that the vacuoles were dilated axons of the  
408 neurons. Examination of the mitochondrial morphology showed sparse cristae in the mutant,  
409 even though the neurons retained their structures (Fig. 4J and 4 K).

410

#### 411 ***Txn1-F54L shows decreased insulin-reducing activity***

412 Fig. 5A shows the thioredoxin/peroxiredoxin system. Four central enzyme systems defend  
413 against oxidative stress by scavenging ROS generated in the body. These include SOD, which  
414 scavenges superoxide, CAT, GPx, and thioredoxin-dependent peroxiredoxin (Prdx).  
415 Thioredoxin forms a system with nicotinamide adenine dinucleotide phosphate (NADPH) and  
416 thioredoxin reductase (Txnrd) to reduce disulfide bonds in target proteins. Thioredoxin is  
417 responsible for converting the target protein from oxidized to the reduced form and  
418 scavenging H<sub>2</sub>O<sub>2</sub> via Prdx. To confirm whether the reduced expression of Txn1 underlies the  
419 changes in the brain during 3–5 weeks of age, we examined the expression level of Txn1  
420 protein in the brain, kidney, heart, and liver by western blotting at four weeks of age when  
421 vacuoles appeared and at 16 weeks of age when repair occurred. We found that Txn1 was  
422 equally expressed in all organs, and there was no change between 4 and 16 weeks of age (Fig.  
423 5B).

424

425 Next, we measured thioredoxin activity by using recombinant protein (Fig. 5C), the thalamus  
426 at five weeks of age, where vacuolar degeneration was observed (Fig. 5D), and the frontal  
427 cortex (Fig. 5E), where vacuolar degeneration did not occur. Our results showed that the  
428 insulin-reducing activity of *Txn1-F54L* was decreased to approximately one-third of that of  
429 the WT. Similarly, insulin-reduction activity in the thalamus was reduced in heterozygotes  
430 and reduced much further in homozygotes compared to that in WT mice (Fig. 5D).

431 Interestingly, reduced activity was also observed in the cortex, where there was no vacuolar  
432 degeneration (Fig. 5E).

433

#### 434 ***Oxidative damage in the midbrain and susceptibility to cell death under oxidative stress***

435 Next, we investigated the pathogenesis underlying the vacuolar degeneration. Staining with  
436 8-OHdG, which indicates oxidative stress-induced DNA damage, and 4-HNE, which  
437 indicates lipid oxidation, showed brain staining in the mutant lesions (Fig. 6A). The area of  
438 8-OHdG (Fig. 6B) and 4-HNE (Fig. 6C) positive cells were significantly increased in  
439 heterozygous and homozygous rats compared to WT cells. TUNEL assay of  
440 paraffin-embedded sections, including the thalamus, showed slight staining in heterozygous  
441 and homozygous rats at three weeks of age (Fig. 6D). Next, we examined cellular  
442 vulnerability to H<sub>2</sub>O<sub>2</sub> using primary fibroblasts and cortical neurons derived from WT and  
443 homozygous rats. The TUNEL assay showed that homozygous fibroblasts were slightly  
444 stained even under standard culture medium, and the staining became significantly stronger  
445 when H<sub>2</sub>O<sub>2</sub> was added. In contrast, TUNEL-positive cells in WT fibroblasts did not increase  
446 with the addition of 0.3 mM H<sub>2</sub>O<sub>2</sub> (Fig. 6E). We also found that WT primary neurons showed  
447 no significant changes, whereas homozygous neurons showed cell death and nuclear rupture  
448 on treatment with 0.3 mM H<sub>2</sub>O<sub>2</sub> (Fig. 6F).

449

#### 450 ***Txn1-F54L rat generated by genome editing replicates vacuolar degeneration in the*** 451 ***midbrain***

452 Finally, we conducted reproducibility experiments to confirm whether the *Txn1*-F54L  
453 mutation is the sole cause of the F344/NSlc phenotype. Genome editing using CRISPR-Cas9  
454 was used to generate F344/Jcl rats with the *Txn1*-F54L mutation. We placed 5-week-old  
455 F344/Jcl *Txn1*-F54L heterozygous rats under 24-hour video monitoring and recorded running  
456 seizures eight times/24 h (a total of N = 5) (Supplementary Video 2). Running seizures and

457 transition from running to tonic seizures were observed. These seizure symptoms were similar  
458 to those observed in *Adem* rats harboring *Txn1*-F54L. The lesions were localized in the  
459 thalamus, hypothalamus, and superior and inferior colliculi and were more extensive in  
460 homozygous than in heterozygous rats (Fig. 7A and 7 B). The vacuoles in the midbrain  
461 started developing at two weeks of age, became apparent at three weeks, and recovered at  
462 nine weeks (Supplementary figure 4). Although the genetic background of F344/NSlc  
463 generated by ENU-mutagenesis and F344/Jcl is somewhat different, transient vacuolar  
464 degeneration localized in the midbrain was reproduced in F344/Jcl rats carrying the *Txn1*-  
465 F54L mutation.

466

## 467 **Discussion**

468 The function of TXN in vivo remains unclear. *Txn1* is located in the cytoplasm, nucleus, and  
469 extracellular region [25, 28], whereas *Txn2* is located in the mitochondria [29]. A  
470 homozygous *TXN2* mutation has been linked to an infantile-onset neurodegenerative disorder  
471 with severe cerebellar and optic atrophy and peripheral neuropathy [30]. To the best of our  
472 knowledge, there are no reports of *TXN1* mutations that cause human diseases. Herein, we  
473 discovered a link between *Txn1* mutations and CNS disorders in mammals for the first time.  
474 The loss of *Txn1* function leads to neuronal death with abnormal mitochondrial structure in  
475 the midbrain.

476 *Txnrd* catalyzes the reduction of oxidized *Txn* in an NADPH-dependent manner. Genetically  
477 modified mice with inactivation of *Txnrd1* or *Txnrd2* show embryonic lethality [31, 32], so  
478 the *Txn*/*Txnrd* systems have not been elucidated in vivo beyond the fact that they are  
479 essential for fetal development. Other important interacting proteins include the *Prdx* family,  
480 which scavenges H<sub>2</sub>O<sub>2</sub>. Knockout mice for *Prdx1*, *Prdx2*, *Prdx3*, *Prdx4*, or *Prdx5* exhibited  
481 various kinds of disorders such as hemolytic anemia, metabolic abnormalities, inflammation,

482 cancer, and age-related phenotypes [33]. The discovery of *Adem* rats may shed light on new  
483 roles of the Txn/ Txnrd systems and Txn/ Prdx systems.

484

485 *Adem* rats exhibited running seizures and a transition from running to tonic seizures. The  
486 focus on this unique epileptic seizure has led to a significant discovery. Running seizures are  
487 rarely reported as symptoms of epileptic seizures. According to reports from the 1980s and  
488 the 1990s, electrical stimulation of the inferior colliculus and midbrain reticular formation [34,  
489 35, 36] or intense acoustic stimulation [37] induced running seizures. In addition, some  
490 evoked running seizures are followed by tonic seizures [35, 36, 37]. The seizure symptoms in  
491 the *Adem* rats share similarities with these symptoms. The time of spontaneous appearance  
492 and suppression of epileptic seizures and the time of onset and repair of the midbrain lesion  
493 were almost the same. This suggests that the cause of epilepsy is a midbrain lesion involving  
494 the inferior colliculus and thalamus.

495

496 Upon observing the unique vacuolar degeneration in the midbrain of *Adem* rats, we had  
497 several questions. First, is there a reduction in cell number in the midbrain? Second, is there  
498 an alteration in the reducing activity of *Txn1-F54L*? Third, are the cells derived  
499 from *Adem* rats more prone to cell death in response to excess ROS? Fourth, why are  
500 vacuoles confined to the midbrain at 3–5 weeks of age? We have discussed our findings based  
501 on these questions below.

502

503 Western blotting and immunohistochemistry showed a reduction in both neurons and  
504 oligodendrocytes in the *Adem* rats. The cell bodies of NeuN-positive cells were more  
505 significant than in the WT, and pronounced axon swelling was identified by TEM. These  
506 findings suggest that vacuoles are involved in neuronal and oligodendrocyte cell death.

507 Neuronal activity controls oligodendrocyte development and myelination [38, 39, 40], and

508 neuronal cell death inhibits myelination. Further, as neurons and oligodendrocytes are closely  
509 related during development, cell death can occur.

510

511 Our recombinant protein assay showed that the insulin-reducing activity in the mutant rats  
512 decreased to approximately one-third that of the WT. In addition, reduced enzymatic activity  
513 was observed in the thalamus, where there was a lesion, and in the cortex, where no lesion  
514 was present. F54L is located far from the CGPC motif, which plays a central role in TXN  
515 activity. However, PolyPhen-2 and SIFT predicted that the F54L mutation was a  
516 loss-of-function mutation. The missense mutation may cause a structural change in the region  
517 where the dithiol/disulfide exchange reaction occurs.

518

519 In primary cultured neurons and fibroblasts derived from *Adem* rats, cell death was induced  
520 more readily than in the WT in the culture medium with H<sub>2</sub>O<sub>2</sub>. IHC with 8-OHdG and 4-HNE,  
521 and TUNEL assays stained more intensely in the brain lesions in *Adem* rats than in the WT.  
522 These results suggest that the cells in *the Adem* rats are vulnerable to excessive ROS. Txn1  
523 has anti-apoptotic functions in various cells [41, 42, 43]. Loss of function of Txn1 can cause  
524 cell death [44, 45, 46]. Proteins that are associated with apoptosis through interaction with  
525 Txn1 include apoptosis signal-regulating kinase 1 (ASK1) [47, 48] and Caspase-3 (CASP3)  
526 [49]. In addition to apoptosis, other mechanisms of neuronal death could be involved, such as  
527 phagocytosis, pyroptosis, and ferroptosis [50]. Western blotting of 5-week-old brains showed  
528 a dense band reacting to anti-Iba1 antibody, suggesting an increase in microglia. Microglial  
529 activation is a common feature of neurodegenerative diseases. Activated microglia have been  
530 reported to kill neurons by releasing TNF- $\alpha$ , glutamate, reactive oxygen, and nitrogen species,  
531 which can cause apoptosis, excitotoxicity, and necrotic death of surrounding neurons [51, 52].

532

533 Our results could not clearly determine why the midbrain vacuoles were confined to 3–5  
534 weeks of age. The *Txn1* gene is ubiquitously expressed throughout the body (*TXN* thioredoxin  
535 [Homo sapiens (human)] - Gene - NCBI <https://www.ncbi.nlm.nih.gov/gene/7295>). Western  
536 blotting of *Adem* rats also showed that thioredoxin was expressed in several organs other than  
537 the brain. The insulin-reducing activity of thioredoxin was reduced to one-third of that of the  
538 WT, both in the thalamus, where vacuolar degeneration appeared, and in the cerebral cortex,  
539 where vacuolar degeneration did not appear. Furthermore, *Adem* rat-derived primary cultured  
540 fibroblasts and neurons showed a similar level of cell death induced by excessive ROS. These  
541 results of *in vitro* experiments indicate that cell death can be caused by excessive ROS,  
542 regardless of the cell type, under the same cell culture conditions. The curious phenomenon of  
543 limited onset of neuronal death in the midbrain may be due to the location- and age-specific  
544 microenvironment of the midbrain. For example, the neurodevelopmental stage at 3–5 weeks  
545 of age might trigger an increased mitochondrial ROS leakage due to high glucose metabolism  
546 in the midbrain. The F54L mutation-specific inability of *Txn1* to reduce essential proteins for  
547 maintaining ROS homeostasis in the midbrain or the dependence of the midbrain region on  
548 the thioredoxin/peroxiredoxin antioxidant system might be high. The  
549 thioredoxin/peroxiredoxin system, and not the glutathione system, was reported to be a  
550 significant contributor to mitochondrial H<sub>2</sub>O<sub>2</sub> removal in the brain [53].

551

552 Another surprising phenomenon in *Adem* rats is that repair of the vacuolar lesions can already  
553 be seen at seven weeks on MRI, and they are almost entirely repaired at nine weeks. Both  
554 astrocytes and microglia have been reported to be involved in cytotoxicity and tissue repair.  
555 Astrocytes have long been thought to inhibit neuronal repair, but it has been noted that glial  
556 activation induces neurogenesis and acts in repair [54, 55]. Microglia phagocytose and  
557 remove debris and dead neurons, and release BDNF and IGF to repair damage to neurons [56,  
558 57, 58]. In vacuolar lesions, glial cells may play roles in repair and impart neuropathic effects,



559 or their roles may change from damage to repair. Although this is an exciting point, it is far  
560 from the purpose of this study, which was to identify a causative gene of epilepsy and clarify  
561 the underlying pathology. We will study this in the future.

562

563 We have not yet identified the precise functions disturbed by Txn1-F54L because Txn1  
564 interacts with a wide variety of proteins [59, 60, 61]. This is a limitation of this study.

565 Oxidative stress is responsible for many neurodegenerative diseases [2, 3, 4] and cerebral  
566 ischemic-reperfusion injury [62, 63]. The vacuolar degeneration in *Adem* rats may share a  
567 common pathological pathway with these neurological disorders. If a common pathway is  
568 identified, *Adem* rats would be an attractive animal model. New therapeutic agents for  
569 oxidative stress-related diseases can be evaluated more easily because neuronal death occurs  
570 spontaneously in a short time and does not require surgical treatment.

571

## 572 **Conclusions**

573 We have shown that the *Txn1*-F54L mutation confers epilepsy. The underlying pathology  
574 of *Adem* rats with *Txn1*-F54L is the loss of neurons and oligodendrocytes in the midbrain.  
575 *Txn1*-F54L had a reduced insulin-reducing activity compared to that of the WT. Primary  
576 cultured cells, both fibroblasts and neurons, derived from *Adem* rats exhibited cell death under  
577 excess H<sub>2</sub>O<sub>2</sub>. The mutation might be affecting the midbrain microenvironment in a specific  
578 manner leading to the death of neurons and oligodendrocytes in that region. Further studies  
579 are required to determine this midbrain-specific function of Txn1.

580

581 **Author contributions**

582 T.M discovered the *Adem* rat; I.O. and M.O. performed the phenotypic characterization of this  
583 strain; T.M. and S.I. created the genome-edited mutant rats; H.I. supervised the MRI  
584 examination and analyzed the data; S.T. supervised the histopathological experiments;  
585 Conceptualization, I.O., M.O., and T. M.; Investigation, I.O., M.O., H.I., S.I., S.T., and T.M.;  
586 Writing – Original Draft, I.O.; Writing – Review & Editing, M.O. H.I., S.I., S.T., and T. M.;  
587 Project Administration, I.O.; Funding Acquisition, M.O., I.O., and T.M. All authors approved  
588 the final manuscript.

589

590 **Declaration of competing interest**

591 The authors declare no competing financial interests.

592

593 **Acknowledgments**

594 We thank Ms. Yumiko Morishita, Mika Monobe, and Miki Kajino for technical assistance  
595 with histology and IHC. We thank Ms. Masumi Hurutani for the technical assistance with EM.  
596 This work was supported by Grants-in-Aid for Scientific Research (16H05354), Grant-in-Aid  
597 for epilepsy research from the Japan Epilepsy Research Foundation, and JSPS KAKENHI  
598 Grant Number JP16H06276 (AdAMS).

599 We would like to thank Editage ([www.editage.com](http://www.editage.com)) for English language editing.

600 **References**

- 601 1. Dringen R. Metabolism and functions of glutathione in brain. *Prog Neurobiol.* 2000  
602 Dec;62(6):649-71. doi: 10.1016/s0301-0082(99)00060-x.
- 603 2. Lin MT, Beal MF. Mitochondrial dysfunction and oxidative stress in neurodegenerative  
604 disease *Nature.* 2006 Oct 19;443(7113):787-95. doi: 10.1038/nature05292.
- 605 3. Uttara B, Singh AV, Zamboni P, Mahajan RT. Oxidative stress and neurodegenerative  
606 diseases: a review of upstream and downstream antioxidant therapeutic options. *Curr*  
607 *Neuropharmacol.* 2009 Mar;7(1):65-74. doi: 10.2174/157015909787602823.

- 608 4. Elfawy HA, Das B. Crosstalk between mitochondrial dysfunction, oxidative stress, and age  
609 related neurodegenerative disease: Etiologies and therapeutic strategies. *Life Sci.* 2019 Feb  
610 1;218:165-184. doi: 10.1016/j.lfs.2018.12.029. Epub 2018 Dec 20.
- 611 5. Nathan C, Cunningham-Bussell A. Beyond oxidative stress: an immunologist's guide to  
612 reactive oxygen species. *Nat Rev Immunol.* 2013 May;13(5):349-61. doi: 10.1038/nri3423.
- 613 6. Dan Dunn J, Alvarez LA, Zhang X, Soldati T. Reactive oxygen species and mitochondria:  
614 A nexus of cellular homeostasis. *Redox Biol.* 2015 Dec;6:472-485. doi:  
615 10.1016/j.redox.2015.09.005. Epub 2015 Sep 10.
- 616 7. Sarniak A, Lipińska J, Tytman K, Lipińska S. Endogenous mechanisms of reactive oxygen  
617 species (ROS) generation. *Postepy Hig Med Dosw (Online).* 2016 Nov 14;70(0):1150-1165.  
618 doi: 10.5604/17322693.1224259.
- 619 8. Dröge W. Free radicals in the physiological control of cell function. *Physiol Rev.* 2002  
620 Jan;82(1):47-95. doi: 10.1152/physrev.00018.2001.
- 621 9. Laurent TC, Moore EC, Reichard P. Enzymatic synthesis of deoxyribonucleotides. Iv.  
622 Isolation and characterization of thioredoxin, the hydrogen donor from *Escherichia coli* B. *J*  
623 *Biol Chem.* 1964 Oct;239:3436-44.
- 624 10 . Wakasugi N, Tagaya Y, Wakasugi H, Mitsui A, Maeda M, Yodoi J, Tursz T. Adult T-cell  
625 leukemia-derived factor/thioredoxin, produced by both human T-lymphotropic virus type I-  
626 and Epstein-Barr virus-transformed lymphocytes, acts as an autocrine growth factor and  
627 synergizes with interleukin 1 and interleukin 2. *Proc Natl Acad Sci U S A.* 1990  
628 Nov;87(21):8282-6. doi: 10.1073/pnas.87.21.8282.
- 629 11. Baker, A., Payne, C. M., Briehl, M. M. & Powis, G. Thioredoxin, a gene found  
630 overexpressed in human cancer, inhibits apoptosis *in vitro* and *in vivo*. *Cancer Res.* 1997 Nov  
631 15;57(22):5162-7.
- 632 12. Lincoln DT, Ali Emadi EM, Tonissen KF, Clarke FM. The thioredoxin-thioredoxin  
633 reductase system: over-expression in human cancer. *Anticancer Res.* 2003  
634 May-Jun;23(3B):2425-33.
- 635 13. Harris IS, Treloar AE, Inoue S, Sasaki M, Gorrini C, Lee KC, Yung KY, Brenner D,  
636 Knobbe-Thomsen CB, Cox MA, Elia A, Berger T, Cescon DW, Adeoye A, Brüstle A,  
637 Molyneux SD, Mason JM, Li WY, Yamamoto K, Wakeham A, Berman HK, Khokha R, Done  
638 SJ, Kavanagh TJ, Lam CW, Mak TW. Glutathione and thioredoxin antioxidant pathways

- 639 synergize to drive cancer initiation and progression. *Cancer Cell*. 2015 Feb 9;27(2):211-22.  
640 doi: 10.1016/j.ccell.2014.11.019.
- 641 14. Zhang J, Li X, Han X, Liu R, Fang J. Targeting the Thioredoxin System for Cancer  
642 Therapy. *Trends Pharmacol Sci*. 2017 Sep;38(9):794-808. doi: 10.1016/j.tips.2017.06.001.
- 643 15. Ghareeb H, Metanis N. The Thioredoxin System: A Promising Target for Cancer Drug  
644 Development. *Chemistry*. 2020 Aug 12;26(45):10175-10184. doi: 10.1002/chem.201905792.
- 645 16. Yamamoto M, Yang G, Hong C, Liu J, Holle E, Yu X, Wagner T, Vatner SF, Sadoshima  
646 J Inhibition of endogenous thioredoxin in the heart increases oxidative stress and cardiac  
647 hypertrophy. *J Clin Invest*. 2003 Nov;112(9):1395-406. doi: 10.1172/JCI17700.
- 648 17. Matsui M, Oshima M, Oshima H, Takaku K, Maruyama T, Yodoi J, Taketo MM. Early  
649 embryonic lethality caused by targeted disruption of the mouse thioredoxin  
650 gene. *Developmental Biology*. 1996;178(1):179-185.
- 651 18. Mashimo T, Yanagihara K, Tokuda S, Voigt B, Takizawa A, Nakajima R, Kato M,  
652 Hirabayashi M, Kuramoto T, Serikawa T. An ENU-induced mutant archive for gene targeting  
653 in rats. *Nat Genet*. 2008 May;40(5):514-5. doi: 10.1038/ng0508-514.
- 654 19. Serikawa T, Mashimo T, Takizawa A, Okajima R, Maedomari N, Kumafuji K, Tagami F,  
655 Neoda Y, Otsuki M, Nakanishi S, Yamasaki K, Voigt B, Kuramoto T. National BioResource  
656 Project-Rat and related activities. *Exp Anim*. 2009 Jul;58(4):333-41.
- 657 20. Ishida S, Sakamoto Y, Nishio T, Baulac S, Kuwamura M, Ohno Y, Takizawa A, Kaneko  
658 S, Serikawa T, Mashimo T. Kcna1-mutant rats dominantly display myokymia, neuromyotonia  
659 and spontaneous epileptic seizures. *Brain Res*. 2012 Jan 30;1435:154-66.
- 660 21. Yoshimi K, Kunihiro Y, Kaneko T, Nagahora H, Voigt B, Mashimo T. ssODN-mediated  
661 knock-in with CRISPR-Cas for large genomic regions in zygotes. *Nat Commun*. 2016 Jan  
662 20;7:10431. doi: 10.1038/ncomms10431.
- 663 22. Miyasaka Y, Uno Y, Yoshimi K, Kunihiro Y, Yoshimura T, Tanaka T, Ishikubo H,  
664 Hiraoka Y, Takemoto N, Tanaka T, Ooguchi Y, Skehel P, Aida T, Takeda J, Mashimo T.  
665 CLICK: one-step generation of conditional knockout mice. *BMC Genomics*. 2018 May  
666 2;19(1):318. doi: 10.1186/s12864-018-4713-y.
- 667 23. Beaudoin GM 3rd, Lee SH, Singh D, Yuan Y, Ng YG, Reichardt LF, Arikath J.  
668 Culturing pyramidal neurons from the early postnatal mouse hippocampus and cortex. *Nat*  
669 *Protoc*. 2012 Sep;7(9):1741-54. doi: 10.1038/nprot.2012.099.

- 670 24. Lu J, Holmgren A. The thioredoxin antioxidant system. *Free Radic Biol Med.* 2014  
671 Jan;66:75-87. doi: 10.1016/j.freeradbiomed.2013.07.036.
- 672 25. Kang Z, Qin T, Zhao Z. Thioredoxins and thioredoxin reductase in chloroplasts: A review  
673 *Gene.* 2019 Jul 20;706:32-42. doi: 10.1016/j.gene.2019.04.041.
- 674 26. Hirota K, Matsui M, Iwata S, Nishiyama A, Mori K, Yodoi J. AP-1 transcriptional activity  
675 is regulated by a direct association between thioredoxin and Ref-1 *Proc Natl Acad Sci U S A.*  
676 1997 Apr 15;94(8):3633-8. doi: 10.1073/pnas.94.8.3633.
- 677 27. S-nitrosation of procaspase-3 and the inhibition of apoptosis in Jurkat cells *Proc Natl*  
678 *Acad Sci U S A.* 2007 Jul 10;104(28):11609-14. doi: 10.1073/pnas.0704898104.
- 679 28. Rubartelli A, Bajetto A, Allavena G, Wollman E, Sitia R. Secretion of thioredoxin by  
680 normal and neoplastic cells through a leaderless secretory pathway. *J Biol Chem.* 1992 Dec  
681 5;267(34):24161-4.
- 682 29. Spyrou G, Enmark E, Miranda-Vizuete A, Gustafsson J. Cloning and expression of a  
683 novel mammalian thioredoxin. *J Biol Chem.* 1997 Jan 31;272(5):2936-41. doi:  
684 10.1074/jbc.272.5.2936.
- 685 30. Holzerova E, Danhauser K, Haack TB, Kremer LS, Melcher M, Ingold I, Kobayashi S,  
686 Terrile C, Wolf P, Schaper J, Mayatepek E, Baertling F, Friedmann Angeli JP, Conrad M,  
687 Strom TM, Meitinger T, Prokisch H, Distelmaier F. Human thioredoxin 2 deficiency impairs  
688 mitochondrial redox homeostasis and causes early-onset neurodegeneration. *Brain.* 2016  
689 Feb;139(Pt 2):346-54. doi: 10.1093/brain/awv350.
- 690 31. Jakupoglu C, Przemeck GK, Schneider M, Moreno SG, Mayr N, Hatzopoulos AK, de  
691 Angelis MH, Wurst W, Bornkamm GW, Brielmeier M, Conrad M. Cytoplasmic thioredoxin  
692 reductase is essential for embryogenesis but dispensable for cardiac development. *Mol Cell*  
693 *Biol.* 2005 Mar;25(5):1980-8. doi: 10.1128/MCB.25.5.1980-1988.2005.
- 694 32. Conrad M, Jakupoglu C, Moreno SG, Lippl S, Banjac A, Schneider M, Beck H,  
695 Hatzopoulos AK, Just U, Sinowatz F, Schmahl W, Chien KR, Wurst W, Bornkamm GW,  
696 Brielmeier M. Essential role for mitochondrial thioredoxin reductase in hematopoiesis, heart  
697 development, and heart function. *Mol Cell Biol.* 2004 Nov;24(21):9414-23. doi:  
698 10.1128/MCB.24.21.9414-9423.2004.
- 699 33. Lee YJ. Knockout Mouse Models for Peroxiredoxins. *Antioxidants (Basel).* 2020 Feb  
700 22;9(2):182. doi: 10.3390/antiox9020182.

- 701 34. McCown TJ, Greenwood RS, Frye GD, Breese GR. Electrically elicited seizures from the  
702 inferior colliculus: a potential site for the genesis of epilepsy? *Exp Neurol*. 1984  
703 Dec;86(3):527-42. doi: 10.1016/0014-4886(84)90087-6.
- 704 35. Hirsch E, Maton B, Vergnes M, Depaulis A, Marescaux C. Reciprocal positive transfer  
705 between kindling of audiogenic seizures and electrical kindling of inferior colliculus. *Epilepsy*  
706 *Res*. 1993 Jun;15(2):133-9. doi: 10.1016/0920-1211(93)90093-m.
- 707 36. Maton B, Vergnes M, Hirsch E, Marescaux C. Involvement of proprioceptive feedback in  
708 brainstem-triggered convulsions. *Epilepsia*. 1997 May;38(5):509-15. doi:  
709 10.1111/j.1528-1157.1997.tb01133.x.
- 710 37. Marescaux C, Vergnes M, Kiesmann M, Depaulis A, Micheletti G, Warter JM. Kindling  
711 of audiogenic seizures in Wistar rats: an EEG study. *Exp Neurol*. 1987 Jul;97(1):160-8. doi:  
712 10.1016/0014-4886(87)90290-1.
- 713 38. Fields RD. A new mechanism of nervous system plasticity:  
714 activity-dependent myelination. *Nat Rev Neurosci*. 2015 Dec;16(12):756-67. doi:  
715 10.1038/nrn4023.
- 716 39. Foster AY, Bujalka H, Emery B. Axoglial interactions in myelin plasticity: Evaluating the  
717 relationship between neuronal activity and oligodendrocyte dynamics. *Glia*. 2019  
718 Nov;67(11):2038-2049. doi: 10.1002/glia.23629.
- 719 40. Pease-Raissi SE, Chan JR. Building a (w)rapport between neurons and oligodendroglia:  
720 Reciprocal interactions underlying adaptive myelination. *Neuron*. 2021 Apr  
721 21;109(8):1258-1273. doi: 10.1016/j.neuron.2021.02.003.
- 722 41. Baker A, Payne CM, Briehl MM, Powis G. Thioredoxin, a gene found overexpressed in  
723 human cancer, inhibits apoptosis *in vitro* and *in vivo*. *Cancer Res*. 1997 Nov  
724 15;57(22):5162-7.
- 725 42. Andoh T, Chock PB, Chiueh CC. The roles of thioredoxin in protection against oxidative  
726 stress-induced apoptosis in SH-SY5Y cells. *J Biol Chem*. 2002 Mar 22;277(12):9655-60. doi:  
727 10.1074/jbc.M110701200.
- 728 43. Haendeler J, Hoffmann J, Tischler V, Berk BC, Zeiher AM, Dimmeler S. Redox  
729 regulatory and anti-apoptotic functions of thioredoxin depend on S-nitrosylation at cysteine  
730 69. *Nat Cell Biol*. 2002 Oct;4(10):743-9. doi: 10.1038/ncb851.

- 731 44. Tonissen KF, Di Trapani G.  
732 Thioredoxin system inhibitors as mediators of apoptosis for cancer therapy. *Mol Nutr Food*  
733 *Res.* 2009 Jan;53(1):87-103. doi: 10.1002/mnfr.200700492.
- 734 45. Circu ML, Aw TY. Reactive oxygen species, cellular redox systems, and apoptosis. *Free*  
735 *Radic Biol Med.* 2010 Mar 15;48(6):749-62. doi: 10.1016/j.freeradbiomed.2009.12.022.
- 736 46. Benhar M. Oxidants, Antioxidants and Thiol Redox Switches in the Control of Regulated  
737 Cell Death Pathways. *Antioxidants (Basel).* 2020 Apr 11;9(4):309. doi:  
738 10.3390/antiox9040309.
- 739 47. Saitoh M, Nishitoh H, Fujii M, Takeda K, Tobiume K, Sawada Y, Kawabata M,  
740 Miyazono K, Ichijo H. Mammalian thioredoxin is a direct inhibitor of apoptosis  
741 signal-regulating kinase (ASK) 1. *EMBO J.* 1998 May 1;17(9):2596-606. doi:  
742 10.1093/emboj/17.9.2596.
- 743 48. Tobiume K, Matsuzawa A, Takahashi T, Nishitoh H, Morita K, Takeda K, Minowa O,  
744 Miyazono K, Noda T, Ichijo H. ASK1 is required for sustained activations of JNK/p38 MAP  
745 kinases and apoptosis. *EMBO Rep.* 2001 Mar;2(3):222-8. doi: 10.1093/embo-reports/kve046.
- 746 49. Mitchell DA, Marletta MA. Thioredoxin catalyzes the S-nitrosation of the caspase-3  
747 active site cysteine. *Nat Chem Biol.* 2005 Aug;1(3):154-8. doi: 10.1038/nchembio720. Epub  
748 2005 Jul 10.
- 749 50. Fricker M, Tolkovsky AM, Borutaite V, Coleman M, Brown GC. Neuronal cell death.  
750 *Physiol Rev.* 2018 Apr 1;98(2):813-880. doi: 10.1152/physrev.00011.2017.
- 751 51. Block ML, Zecca L, Hong JS. Microglia-mediated neurotoxicity: uncovering the  
752 molecular mechanisms. *Nat Rev Neurosci* 8: 57–69, 2007. doi:10.1038/nrn2038.
- 753 52. Brown GC, Vilalta A. How microglia kill neurons. *Brain Res* 1628, Pt B: 288–297, 2015.  
754 doi:10.1016/j.brainres.2015.08.031.
- 755 53. Drechsel DA, Patel M. Respiration-dependent H<sub>2</sub>O<sub>2</sub> removal in brain mitochondria via the  
756 thioredoxin/peroxiredoxin system. *J Biol Chem.* 2010 Sep 3;285(36):27850-8.
- 757 54. Silver J, Miller JH. Regeneration beyond the glial scar. *Nat Rev Neurosci.* 2004  
758 Feb;5(2):146-56. doi: 10.1038/nrn1326.
- 759 55. Rolls A, Shechter R, Schwartz M. The bright side of the glial scar in CNS repair. *Nat Rev*  
760 *Neurosci.* 2009 Mar;10(3):235-41. doi: 10.1038/nrn2591.

- 761 56. Nayak D, Roth TL, McGavern DB. Microglia development and function. *Annu Rev*  
762 *Immunol.* 2014;32:367-402. doi: 10.1146/annurev-immunol-032713-120240.
- 763 57. Colonna M, Butovsky O. Microglia Function in the Central Nervous System During  
764 Health and Neurodegeneration. *Annu Rev Immunol.* 2017 Apr 26;35:441-468.
- 765 58. Bohlen CJ, Friedman BA, Dejanovic B, Sheng M. Microglia in Brain Development,  
766 Homeostasis, and Neurodegeneration. *Annu Rev Genet.* 2019 Dec 3;53:263-288.
- 767 59. Kumar JK, Tabor S, Richardson CC. Proteomic analysis of thioredoxin-targeted proteins  
768 in *Escherichia coli*. *Proc Natl Acad Sci U S A.* 2004 Mar 16;101(11):3759-64.
- 769 60. Fu C, Liu T, Parrott AM, Li H. Identification of thioredoxin target protein networks in  
770 cardiac tissues of a transgenic mouse. *Methods Mol Biol.* 2013;1005:181-97.
- 771 61. Carrari F, Nunes-Nesi A, Buchanan BB, Reichheld JP, Araújo WL, Fernie AR.  
772 Thioredoxin, a master regulator of the tricarboxylic acid cycle in plant mitochondria. *Proc*  
773 *Natl Acad Sci U S A.* 2015 Mar 17;112(11):E1392-400.
- 774 62. Allen CL, Bayraktutan U. Oxidative stress and its role in the pathogenesis of ischaemic  
775 stroke. *Int J Stroke.* 2009 Dec;4(6):461-70. doi: 10.1111/j.1747-4949.2009.00387.x.
- 776 63. Orellana-Urzúa S, Rojas I, Líbano L, Rodrigo R. Pathophysiology of Ischemic Stroke:  
777 Role of Oxidative Stress. *Curr Pharm Des.* 2020;26(34):4246-4260. doi:  
778 10.2174/1381612826666200708133912.
- 779



780 **Figure legends**

781 **Fig. 1.** Discovery of a novel epileptic rat with a *Txn1* missense mutation.

782 (A) *Adem* locus mapped to a 1.5-Mb genomic region, between markers D5Mit17 and

783 D5Rat113.

784 (B) DNA sequencing exhibiting c. T160C in exon 3 of the *Txn1* gene, causing a substitution

785 of phenylalanine for leucine at residue 54.

786 (C) Functional sites and F54 were plotted in the 3D structure of human thioredoxin.

787 (D) Alignments of the sequence of *Txn1* gene in mammals.

788

789 **Fig. 2.** Vacuolar degeneration appears during an epileptic period.

790 (A) Total seizure frequency of heterozygotes at each week (N = 8).

791 (B) Total seizure frequency of homozygotes at each week (N = 9).

792 (C) Histology at five weeks of age. At least three animals of each genotype were examined.

793 (D) The representative changes of inferior colliculus lesions from 2 to 9 weeks of age for each

794 genotype.

795

796 **Fig. 3.** MRI demonstrates transient high signals of T2-weighted images in the midbrain.

797 (A) The representative MRI findings at five weeks for each genotype (sagittal slices).

798 (B) The coronal slices of homozygotes at five weeks.

799 (C) The temporal changes of the brain lesion for each genotype from three to nine weeks.

800

801 **Fig. 4.** Neuronal and oligodendrocyte cell loss occurs in the midbrain.

802 (A) Protein levels of each cell in the midbrain at five weeks. Anti-NeuN, anti-Olig2,

803 anti-GFAP, and Iba1 bodies are markers of neurons, oligodendrocytes, astrocytes, and

804 microglia.

805 (B) IHC of the anti-NeuN-positive cells in the inferior colliculus for each genotype.

806 (C) Quantification of NeuN-positive cells. Quantification was performed by assessing five  
807 randomly selected fields in the inferior colliculus and thalamus for each genotype.

808 (D) IHC of Olig2-positive cells in the inferior colliculus for each genotype.

809 (E) Quantification of Olig2-positive cells. Quantification was performed by assessing five  
810 randomly selected fields in the inferior colliculus and thalamus for each genotype.

811 (F) Representative TEM image in the inferior colliculus of WT rat at four weeks.

812 (G) Magnification of the axon in (F). The yellow arrowhead indicates myelin sheath.

813 (H) Representative TEM image of the synapse in the inferior colliculus of WT rat at four  
814 weeks. The yellow arrowhead indicates mitochondria with normal morphology, and the red  
815 arrowhead indicates postsynaptic density, corresponding with the synaptic terminal.

816 (I) Magnification of the vacuole in (H). The yellow arrowhead indicates the myelin sheath,  
817 and the red arrowhead indicates a microtubule.

818 (J) Representative TEM image of the axon in the midbrain of the heterozygous rat at four  
819 weeks. The yellow arrowhead indicates mitochondria with sparse cristae.

820 (K) Representative TEM image of the synapse in the inferior colliculus of WT rat at four  
821 weeks. The yellow arrowhead indicates mitochondria with sparse cristae, and the red  
822 arrowhead indicates postsynaptic density.

823

824 **Fig.5.** *Txn1*-F54L shows decreased insulin-reducing activity.

825 (A) Thioredoxin/peroxiredoxin system.

826 (B) Protein level of thioredoxin in the brain, kidney, heart, and liver.

827 (C) Insulin-reducing activity determined using recombinant proteins.

828 (D) Insulin-reducing activity of the thalamus for each genotype.

829 (E) Insulin-reducing activity of the cortex for each genotype.

830

831 **Fig. 6.** Oxidative damage in the midbrain and susceptibility to cell death under oxidative  
832 stress.  
833 (A) Oxidative damage in the midbrain was assessed by IHC using anti-8-OHdG antibody and  
834 4-HNE.  
835 (B) Quantification of 8-OHdG-positive cells for each genotype.  
836 (C) Quantification of 4-HNE-positive cells for each genotype.  
837 (D) TUNEL assay of the paraffin-embedded sections including thalamus for each genotype.  
838 (E) TUNEL assay of the primary fibroblasts derived from the WT and homozygous rats.  
839 TUNEL staining was performed under the standard medium with or without 0.3 mM H<sub>2</sub>O<sub>2</sub>.  
840 (F) Mitochondria and nucleus of primary neurons derived from WT and homozygous rats  
841 treated with standard medium with or without 0.3 mM H<sub>2</sub>O<sub>2</sub>.

842  
843 **Fig. 7.** *Txn1*-F54L rat generated by genome editing replicates the vacuolar degeneration in the  
844 midbrain. The yellow arrowheads indicate vacuolar degeneration.

845 (A) Representative HE staining of the sagittal brain section at three weeks for each genotype.  
846 (B) The coronal slices of the brain for each 500 mm section in the heterozygote.

847

848 **Supplementary Fig. 1.** Representative MRI for WT at five weeks.

849 (A) Sagittal slices.  
850 (B) Coronal slices.  
851 (C) Horizontal slices.

852

853 **Supplementary Fig. 2.** Representative MRI for heterozygote at five weeks.

854 (A) Sagittal slices.  
855 (B) Coronal slices.  
856 (C) Horizontal slices.

857

858 **Supplementary Fig. 3.** Representative MRI for homozygote at five weeks.

859 (A) Sagittal slices.

860 (B) Horizontal slices.

861

862 **Supplementary Fig. 4.** *Txn1*-F54L rat generated by genome editing replicates the transient

863 vacuolar degeneration in the midbrain from two to nine weeks of age.

A

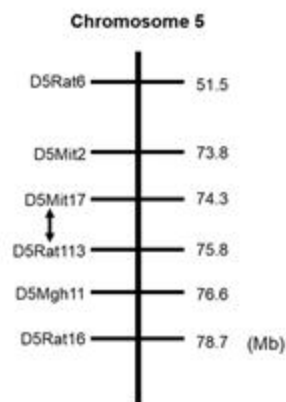

B

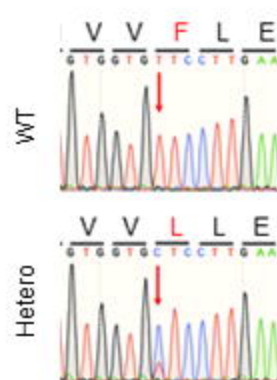

C

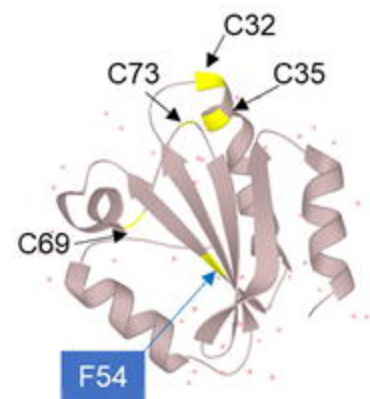

D

|                     | 1                               | 32             | 35                | 54               | 69                                     | 73      | 105     |          |
|---------------------|---------------------------------|----------------|-------------------|------------------|----------------------------------------|---------|---------|----------|
| Human               | MVKQIESKTAFQEALDAAGDKLVVDFSATW  | CGPC           | KMIKPFHSLSEKYSNVV | IFLEVDVDDCQDVASE | CEVCKMPTFQFFKKGQKVGEFSGANKEKLEATINELV  |         |         |          |
| Rat                 | MVKLIESKEAFQEALAAAGDKLVVDFSATW  | CGPC           | KMIKPFHSLCDKYSNVV | IFLEVDVDDCQDVAAD | CEVCKMPTFQFFYKKGQKVGEFSGANKEKLEASITEFA |         |         |          |
| Mouse               | MVKLIESKEAFQEALAAAGDKLVVDFSATW  | CGPC           | KMIKPFHSLCDKYSNVV | IFLEVDVDDCQDVAAD | CEVCKMPTFQFFYKKGQKVGEFSGANKEKLEASITEYA |         |         |          |
| Marmoset            | MVKQIDSKDAFQEALDAAGDKLVVDFSATW  | CGPC           | KMIKPFHSLSEKYSNVV | IFLEVDVDDCQDVASE | CEVCKMPTFQFFKKGQKVGEFSGANKEKLEATINEFV  |         |         |          |
| Sheep               | MVKQIESKYAFQEALNSAGEKLVVDFSATW  | CGPC           | KMIKPFHSLSEKYSNVV | IFLEVDVDDCQDVAAE | CEVCKMPTFQFFKKGQKVSEFSGANKEKLEATINELI  |         |         |          |
| Horse               | MVKQIESKSAFQEALNSAGEKLVVDFSATW  | CGPC           | KMIKPFHSLSEKYSNVV | IFLEVDVDDCQDVAAE | CEVCKMPTFQFFKKGQKVDFEFGANKEKLEATIKGLI  |         |         |          |
| Cattle              | MVKQIESKYAFQEALNSAGEKLVVDFSATW  | CGPC           | KMIKPFHSLSEKYSNVV | IFLEVDVDDCQDVAAE | CEVCKMPTFQFFKKGQKVGEFSGANKEKLEATINELI  |         |         |          |
| Pig                 | MVKQIESKYAFQEALNSAGEKLVVDFSATW  | CGPC           | KMIKPFHSLSEKYSNVV | IFLEVDVDDCQDVASE | CEVCKMPTFQFFKKGQKVGEFSGANKEKLEATINELI  |         |         |          |
| Alpaca              | MVKQIESKYAFQEALNSAGDKLVVDFSATW  | CGPC           | KMIKPFHSLSEKYSNVV | IFLEVDVDDCQDVASE | CEVCKMPTFQFFKKGQKVGEFSGANKEKLEATINELI  |         |         |          |
| Ferret              | MVKQIESKIAFQEALVGAGDKLVVDFSATW  | CGPC           | KMIKPFHSLSEKYSNVV | IFLEVDVDDCQDVASE | CEVCKMPTFQFFKKGQKVGEFSGANKEKLEATINELI  |         |         |          |
| Bat                 | MVKQIDSKDAFEEALTSAGSKLVVDFSATW  | CGPC           | KMIKPFHSLSEKYSNVV | IFLEVDVDDCQDVASE | CEVCKMPTFQFFKNGKQKVGEFSGANKEKLESTINEFI |         |         |          |
| Marmot              | MVKQIESKEAFQEALNSAGDKLVVDFSATW  | CGPC           | KMIKPFHSLSEKYSNVV | IFLEVDVDDCQDVAAE | CEVCKMPTFQFFKKGQKVGEFSGANKEKLEATINEFV  |         |         |          |
| Guinea pig          | MVQQIESKEAFQEALNDAGDKLVVDFSATW  | CGPC           | KMIKPFHSLSEKYSNVV | IFLEVDVDDCQDVAAE | CEVCKMPTFQFFKKGQKVSEFSGANKEKLEATINELV  |         |         |          |
| Chinchilla          | MVQQIETKEAFQQAALAAAGDKLVVDFSATW | CGPC           | KMIKPFHSLSEKYSNVV | IFLEVDVDDCQDVAAE | CEVCKMPTFQFFKKGQKVSEFSGANKEKLEATINELI  |         |         |          |
| Secondary structure | $\beta$                         | $\alpha$       | $\beta$           | $\beta$          | $\alpha$                               | $\beta$ | $\beta$ | $\alpha$ |
|                     | $\beta$ strand                  | $\alpha$ helix |                   |                  |                                        |         |         |          |

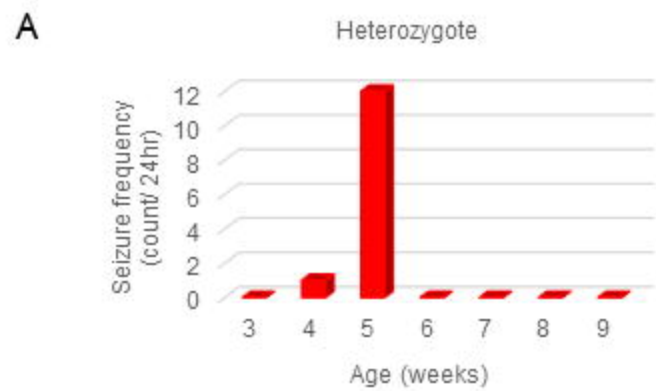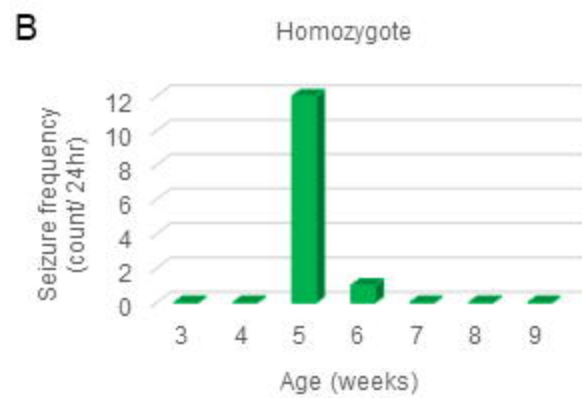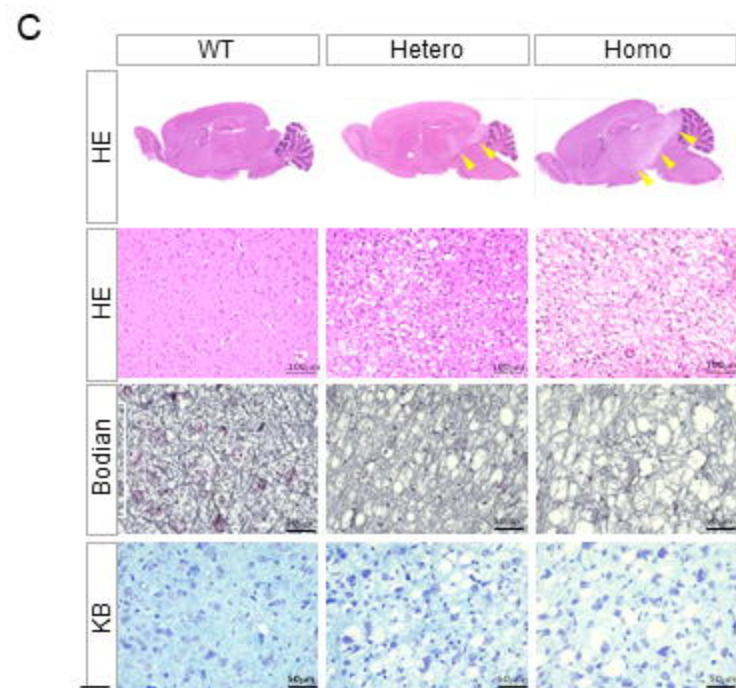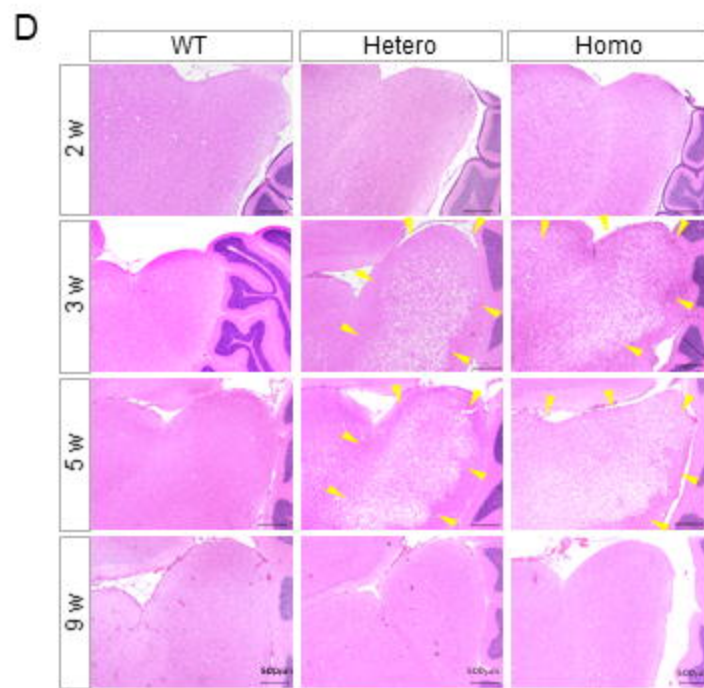

A

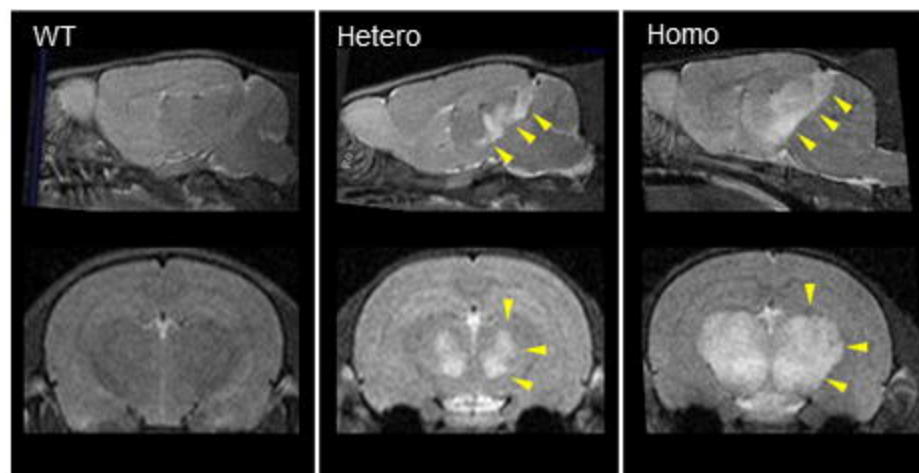

B

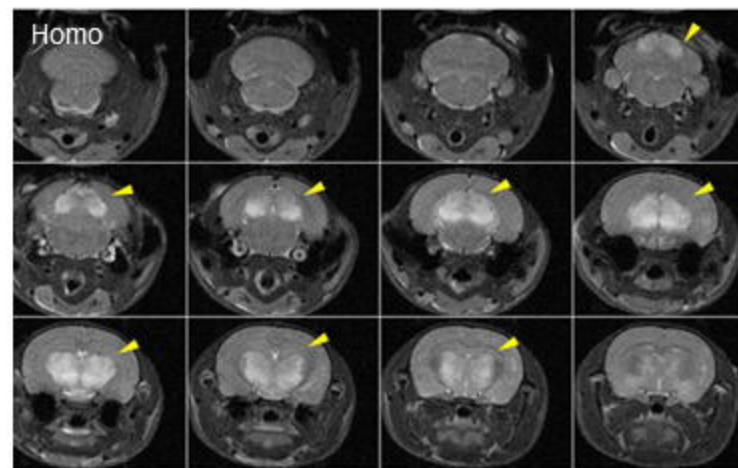

C

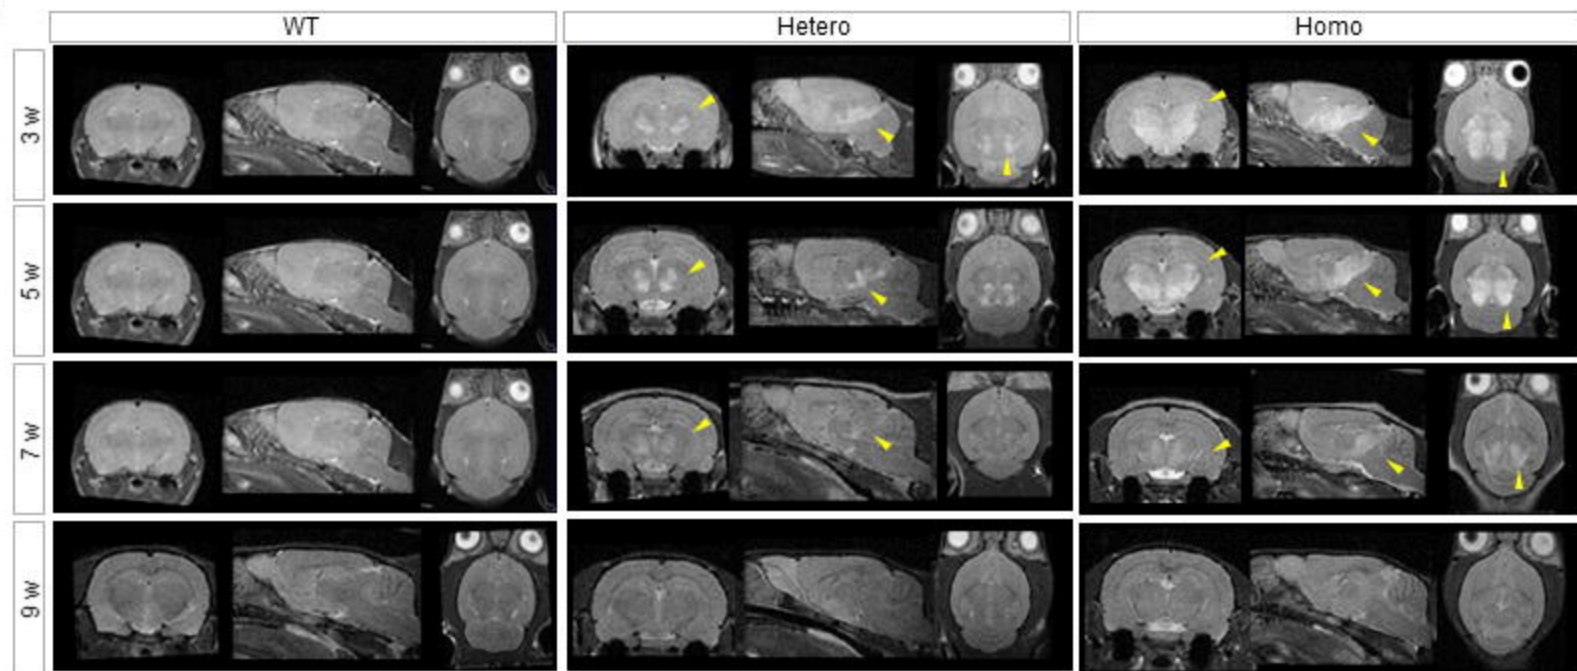

**A**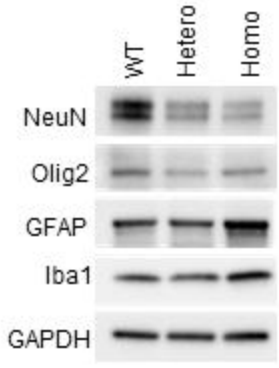**B**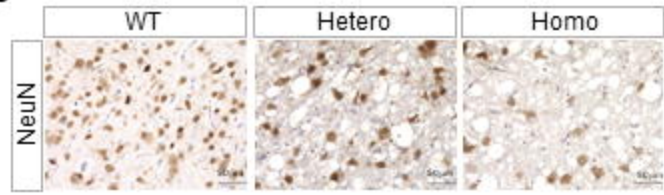**D**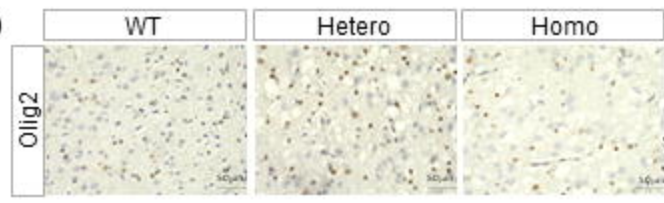**C**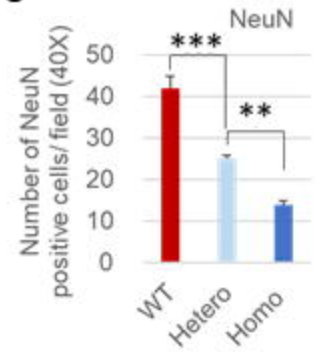**E**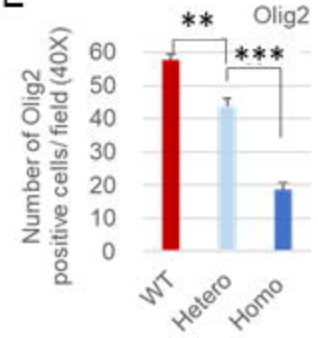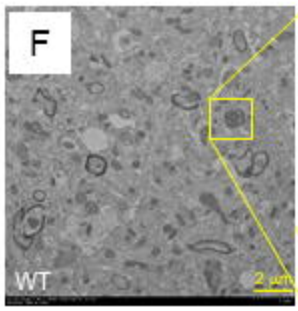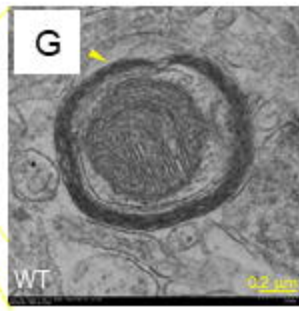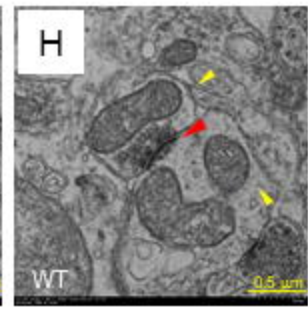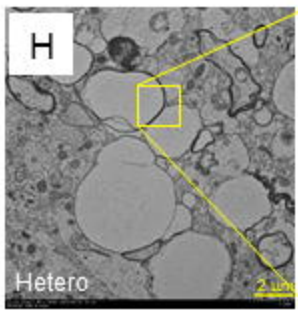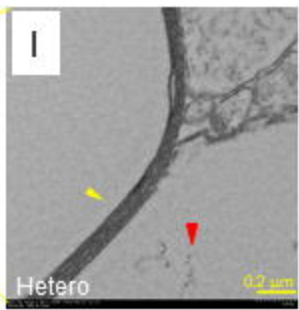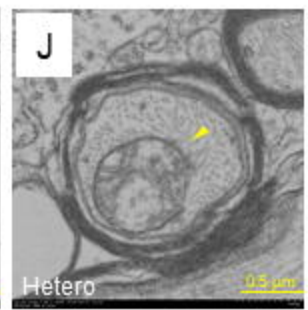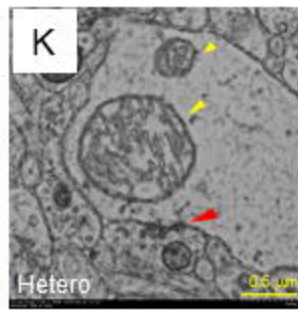



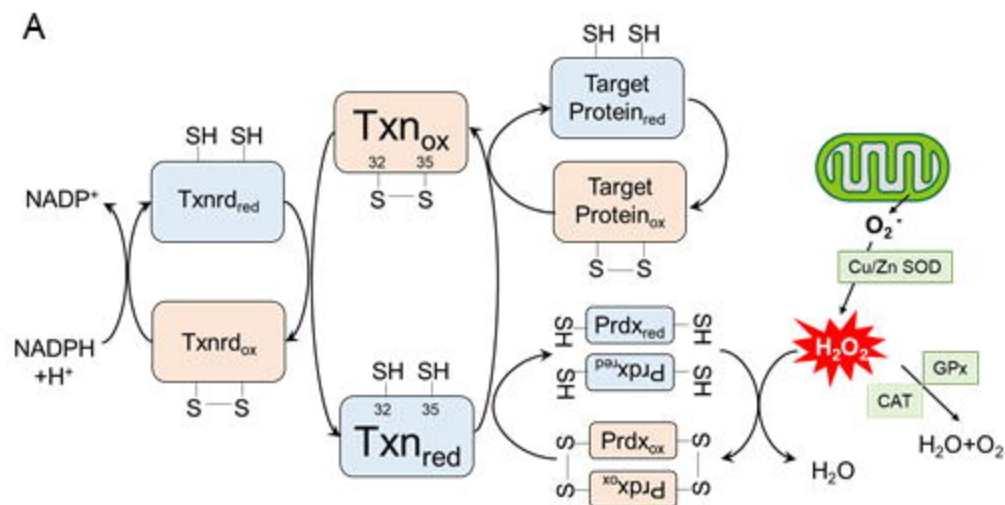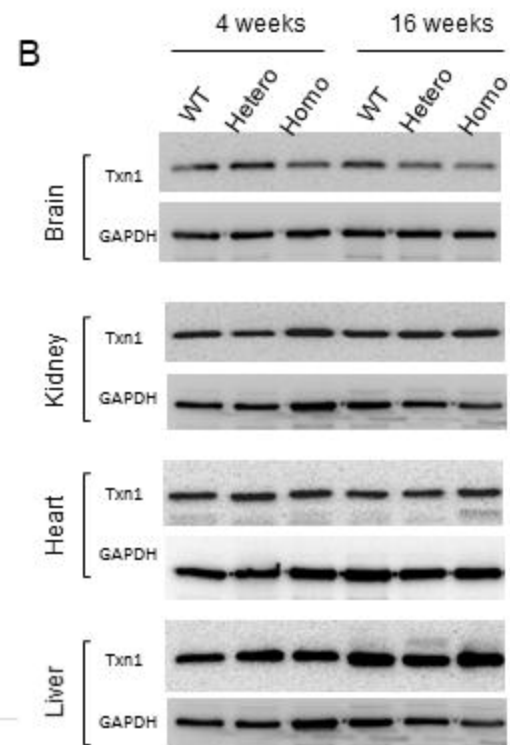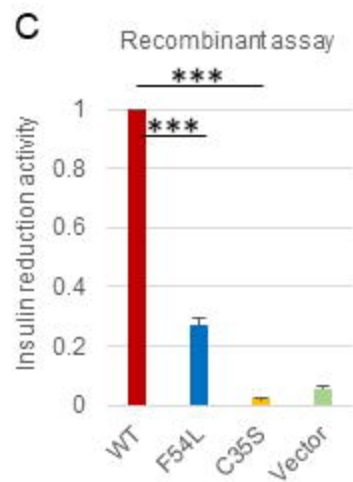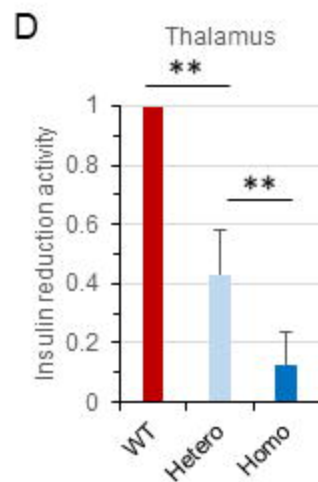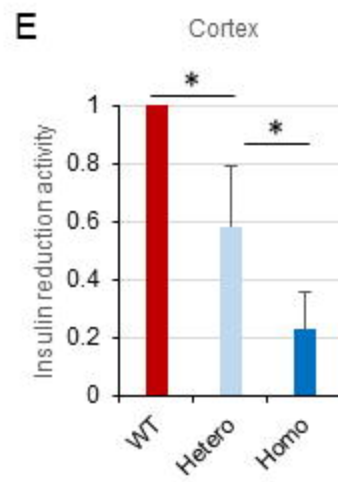

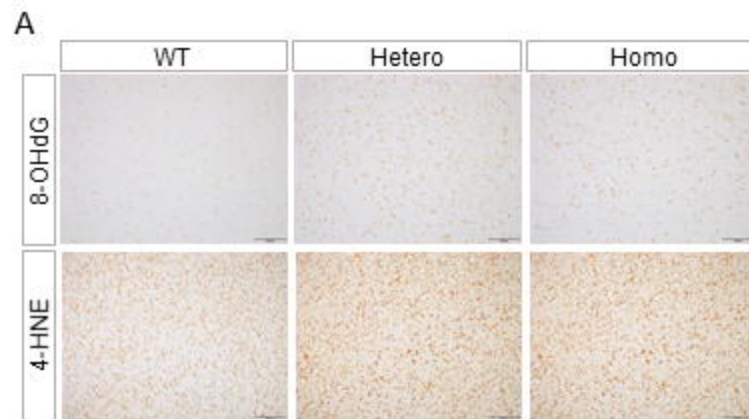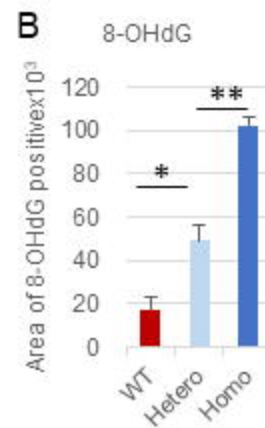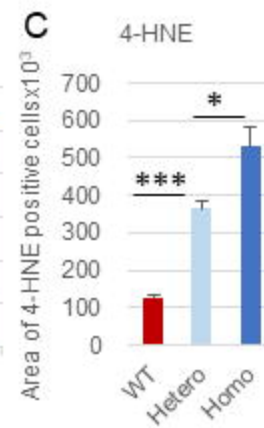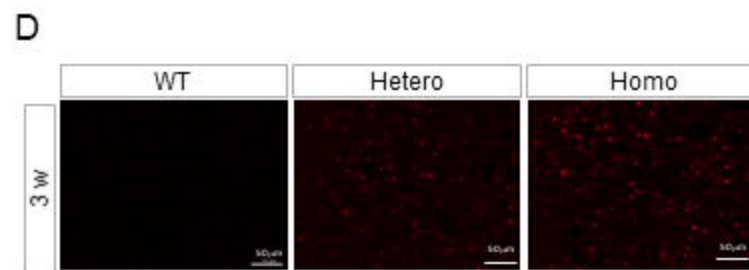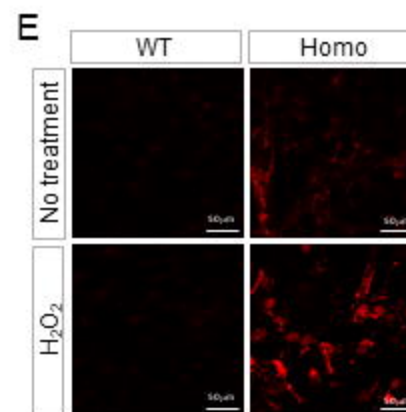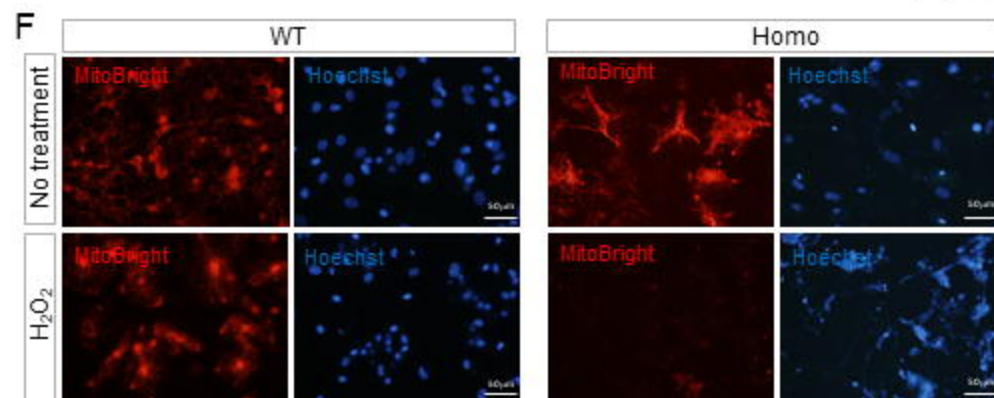

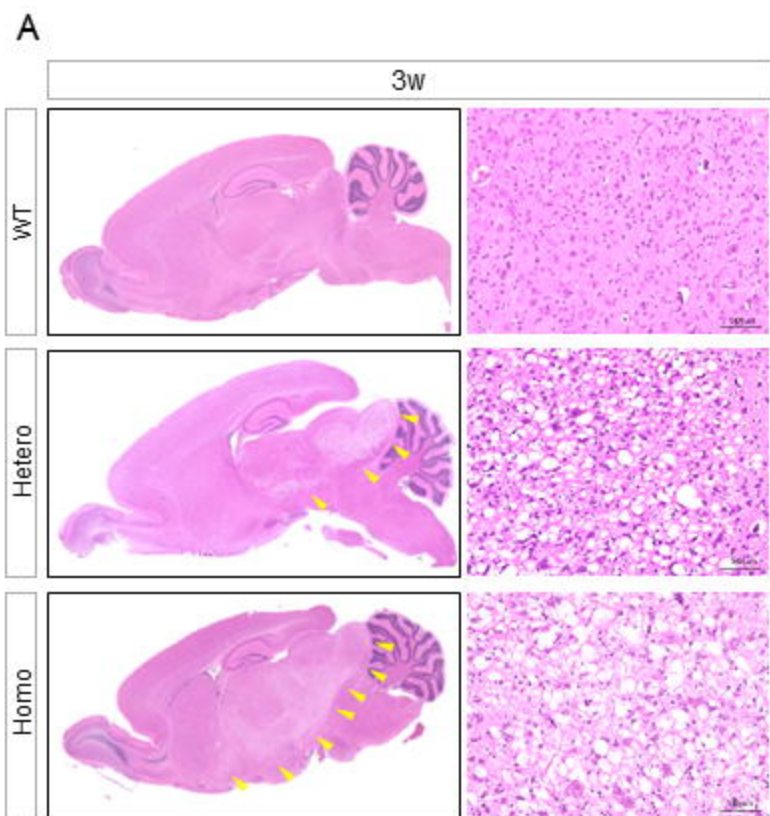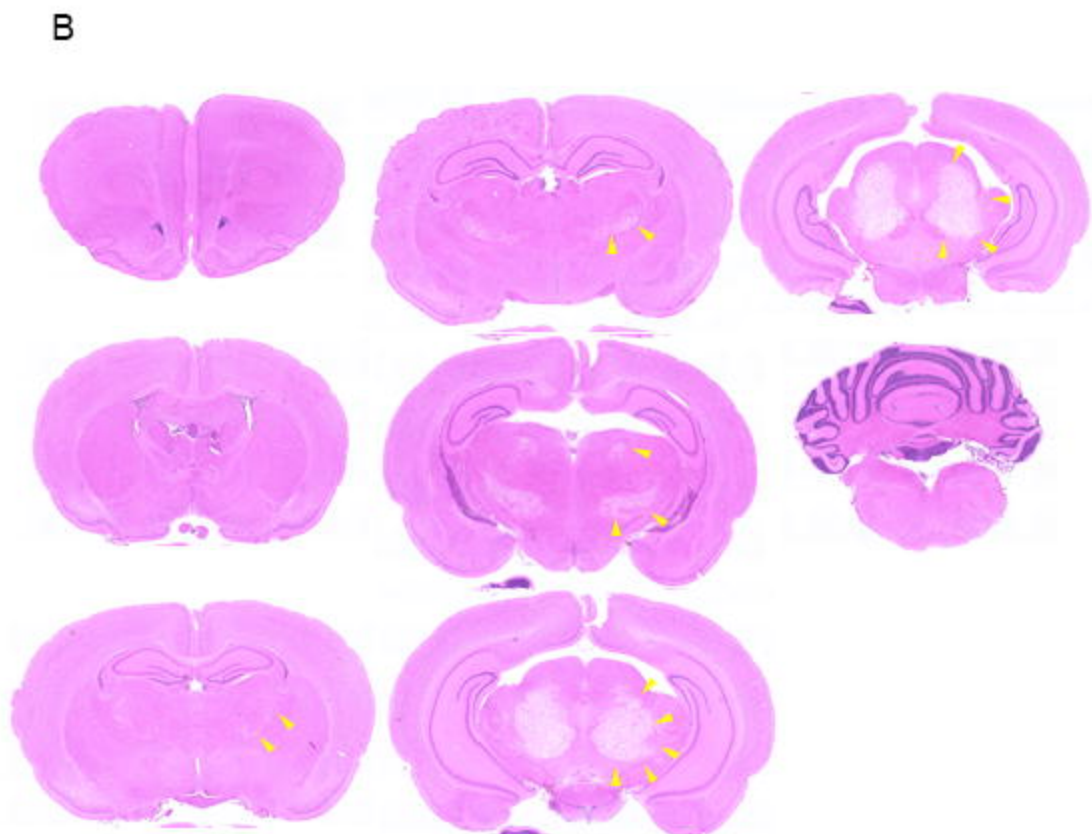

Source: https://www.biorxiv.org/content/10.1101/2021.10.07.463470v1.full.pdf
